# Supplementary material
Source: MDPI journal article supplement (https://www.mdpi.com/2227-7390/10/21/4041)
Supplement: s1 [file s1]

**Supplementary Materials – Tables of Fuzzy TOPSIS for large industries (LI) and small and medium-sized industries (SMI).**

**Table S1.** Matrix  $\tilde{G}$  containing the scores assigned by respondents in the fuzzy triangular form for LIs.

| #   | P1   |      |      | P2   |      |      | P3   |      |      | P4   |      |      | P5   |      |      | P6   |      |      | P7   |      |      | P8   |      |      | P9   |      |      | P10  |      |      |
|-----|------|------|------|------|------|------|------|------|------|------|------|------|------|------|------|------|------|------|------|------|------|------|------|------|------|------|------|------|------|------|
| R1  | 0.75 | 1    | 1    | 0.75 | 1    | 1    | 0.75 | 1    | 1    | 0.75 | 1    | 1    | 0.75 | 1    | 1    | 0.5  | 0.75 | 1    | 0.75 | 1    | 1    | 0.75 | 1    | 1    | 0.5  | 0.75 | 1    | 0.75 | 1    | 1    |
| R2  | 0.5  | 0.75 | 1    | 0.5  | 0.75 | 1    | 0.75 | 1    | 1    | 0.5  | 0.75 | 1    | 0.25 | 0.5  | 0.75 | 0.25 | 0.5  | 0.75 | 0.5  | 0.75 | 1    | 0    | 0.25 | 0.5  | 0.25 | 0.5  | 0.75 | 0.25 | 0.5  | 0.75 |
| R3  | 0.5  | 0.75 | 1    | 0.5  | 0.75 | 1    | 0.5  | 0.75 | 1    | 0.5  | 0.75 | 1    | 0.25 | 0.5  | 0.75 | 0.5  | 0.75 | 1    | 0.5  | 0.75 | 1    | 0.25 | 0.5  | 0.75 | 0.5  | 0.75 | 1    | 0.5  | 0.75 | 1    |
| R4  | 0.5  | 0.75 | 1    | 0.5  | 0.75 | 1    | 0.5  | 0.75 | 1    | 0.25 | 0.5  | 0.75 | 0.25 | 0.5  | 0.75 | 0.5  | 0.75 | 1    | 0.25 | 0.5  | 0.75 | 0.25 | 0.5  | 0.75 | 0.25 | 0.5  | 0.75 | 0.25 | 0.5  | 0.75 |
| R5  | 0.5  | 0.75 | 1    | 0.75 | 1    | 1    | 0.5  | 0.75 | 1    | 0.5  | 0.75 | 1    | 0.5  | 0.75 | 1    | 0.75 | 1    | 1    | 0.5  | 0.75 | 1    | 0.5  | 0.75 | 1    | 0.5  | 0.75 | 1    | 0.75 | 1    | 1    |
| R6  | 0.5  | 0.75 | 1    | 0.25 | 0.5  | 0.75 | 0.5  | 0.75 | 1    | 0.25 | 0.5  | 0.75 | 0.25 | 0.5  | 0.75 | 0.25 | 0.5  | 0.75 | 0.5  | 0.75 | 1    | 0.25 | 0.5  | 0.75 | 0.5  | 0.75 | 1    | 0.25 | 0.5  | 0.75 |
| R7  | 0.5  | 0.75 | 1    | 0.5  | 0.75 | 1    | 0.5  | 0.75 | 1    | 0.5  | 0.75 | 1    | 0.25 | 0.5  | 0.75 | 0.25 | 0.5  | 0.75 | 0    | 0.25 | 0.5  | 0    | 0.25 | 0.5  | 0.25 | 0.5  | 0.75 | 0.75 | 1    | 1    |
| R8  | 0.75 | 1    | 1    | 0.25 | 0.5  | 0.75 | 0.5  | 0.75 | 1    | 0.75 | 1    | 1    | 0.5  | 0.75 | 1    | 0.75 | 1    | 1    | 0.5  | 0.75 | 1    | 0.25 | 0.5  | 0.75 | 0.75 | 1    | 1    | 0.5  | 0.75 | 1    |
| R9  | 0.5  | 0.75 | 1    | 0.5  | 0.75 | 1    | 0.5  | 0.75 | 1    | 0.5  | 0.75 | 1    | 0.5  | 0.75 | 1    | 0.25 | 0.5  | 0.75 | 0.5  | 0.75 | 1    | 0.5  | 0.75 | 1    | 0.25 | 0.5  | 0.75 | 0.75 | 1    | 1    |
| R10 | 0.25 | 0.5  | 0.75 | 0.5  | 0.75 | 1    | 0.5  | 0.75 | 1    | 0.5  | 0.75 | 1    | 0.5  | 0.75 | 1    | 0.5  | 0.75 | 1    | 0.5  | 0.75 | 1    | 0.5  | 0.75 | 1    | 0.5  | 0.75 | 1    | 0.5  | 0.75 | 1    |
| R11 | 0.5  | 0.75 | 1    | 0.5  | 0.75 | 1    | 0.5  | 0.75 | 1    | 0.5  | 0.75 | 1    | 0.5  | 0.75 | 1    | 0.5  | 0.75 | 1    | 0.25 | 0.5  | 0.75 | 0.25 | 0.5  | 0.75 | 0.25 | 0.5  | 0.75 | 0.25 | 0.5  | 0.75 |
| R12 | 0.5  | 0.75 | 1    | 0.5  | 0.75 | 1    | 0.5  | 0.75 | 1    | 0.5  | 0.75 | 1    | 0.5  | 0.75 | 1    | 0.25 | 0.5  | 0.75 | 0.5  | 0.75 | 1    | 0.25 | 0.5  | 0.75 | 0    | 0.25 | 0.5  | 0.25 | 0.5  | 0.75 |
| R13 | 0.5  | 0.75 | 1    | 0.5  | 0.75 | 1    | 0.5  | 0.75 | 1    | 0.5  | 0.75 | 1    | 0.5  | 0.75 | 1    | 0.25 | 0.5  | 0.75 | 0.5  | 0.75 | 1    | 0.5  | 0.75 | 1    | 0.5  | 0.75 | 1    | 0.5  | 0.75 | 1    |
| R14 | 0.25 | 0.5  | 0.75 | 0.25 | 0.5  | 0.75 | 0.25 | 0.5  | 0.75 | 0    | 0.25 | 0.5  | 0    | 0.25 | 0.5  | 0    | 0.25 | 0.5  | 0    | 0.25 | 0.5  | 0    | 0.25 | 0.5  | 0    | 0.25 | 0.5  | 0    | 0.25 | 0.5  |
| R15 | 0.25 | 0.5  | 0.75 | 0.25 | 0.5  | 0.75 | 0.5  | 0.75 | 1    | 0.25 | 0.5  | 0.75 | 0.25 | 0.5  | 0.75 | 0.25 | 0.5  | 0.75 | 0.25 | 0.5  | 0.75 | 0.25 | 0.5  | 0.75 | 0.25 | 0.5  | 0.75 | 0.25 | 0.5  | 0.75 |
| R16 | 0.5  | 0.75 | 1    | 0.25 | 0.5  | 0.75 | 0.5  | 0.75 | 1    | 0.5  | 0.75 | 1    | 0.25 | 0.5  | 0.75 | 0.5  | 0.75 | 1    | 0.25 | 0.5  | 0.75 | 0.25 | 0.5  | 0.75 | 0.25 | 0.5  | 0.75 | 0    | 0.25 | 0.5  |
| R17 | 0.25 | 0.5  | 0.75 | 0.25 | 0.5  | 0.75 | 0.25 | 0.5  | 0.75 | 0.25 | 0.5  | 0.75 | 0.25 | 0.5  | 0.75 | 0    | 0.25 | 0.5  | 0.25 | 0.5  | 0.75 | 0.25 | 0.5  | 0.75 | 0    | 0.25 | 0.5  | 0.25 | 0.5  | 0.75 |
| R18 | 0.25 | 0.5  | 0.75 | 0.25 | 0.5  | 0.75 | 0.25 | 0.5  | 0.75 | 0.25 | 0.5  | 0.75 | 0.5  | 0.75 | 1    | 0.5  | 0.75 | 1    | 0.5  | 0.75 | 1    | 0.25 | 0.5  | 0.75 | 0.5  | 0.75 | 1    | 0.25 | 0.5  | 0.75 |
| R19 | 0.25 | 0.5  | 0.75 | 0.25 | 0.5  | 0.75 | 0.25 | 0.5  | 0.75 | 0.25 | 0.5  | 0.75 | 0    | 0.25 | 0.5  | 0    | 0.25 | 0.5  | 0.25 | 0.5  | 0.75 | 0    | 0.25 | 0.5  | 0.25 | 0.5  | 0.75 | 0.5  | 0.75 | 1    |
| R20 | 0.75 | 1    | 1    | 0.75 | 1    | 1    | 0.75 | 1    | 1    | 0.5  | 0.75 | 1    | 0.75 | 1    | 1    | 0.75 | 1    | 1    | 0.5  | 0.75 | 1    | 0.5  | 0.75 | 1    | 0.5  | 0.75 | 1    | 0.75 | 1    | 1    |
| R21 | 0.75 | 1    | 1    | 0.5  | 0.75 | 1    | 0.75 | 1    | 1    | 0.75 | 1    | 1    | 0.25 | 0.5  | 0.75 | 0.25 | 0.5  | 0.75 | 0.5  | 0.75 | 1    | 0    | 0.25 | 0.5  | 0.25 | 0.5  | 0.75 | 0.25 | 0.5  | 0.75 |
| R22 | 0.25 | 0.5  | 0.75 | 0.25 | 0.5  | 0.75 | 0.25 | 0.5  | 0.75 | 0.25 | 0.5  | 0.75 | 0.5  | 0.75 | 1    | 0.25 | 0.5  | 0.75 | 0.25 | 0.5  | 0.75 | 0.5  | 0.75 | 1    | 0.25 | 0.5  | 0.75 | 0    | 0.25 | 0.5  |

**(Table S1 - Continues)**

(Table S1 - Ends)

| #   | P10  |      |      | P11  |      |      | P12  |      |      | P13  |      |      | P14  |      |      | P15  |      |      | P16  |      |      |
|-----|------|------|------|------|------|------|------|------|------|------|------|------|------|------|------|------|------|------|------|------|------|
| R1  | 0.75 | 1    | 1    | 0.75 | 1    | 1    | 0.75 | 1    | 1    | 0.75 | 1    | 1    | 0.75 | 1    | 1    | 0.75 | 1    | 1    | 0.75 | 1    | 1    |
| R2  | 0.25 | 0.5  | 0.75 | 0.5  | 0.75 | 1    | 0.25 | 0.5  | 0.75 | 0.25 | 0.5  | 0.75 | 0.5  | 0.75 | 1    | 0.5  | 0.75 | 1    | 0.5  | 0.75 | 1    |
| R3  | 0.5  | 0.75 | 1    | 0.5  | 0.75 | 1    | 0.75 | 1    | 1    | 0.25 | 0.5  | 0.75 | 0    | 0.25 | 0.5  | 0.25 | 0.5  | 0.75 | 0.5  | 0.75 | 1    |
| R4  | 0.25 | 0.5  | 0.75 | 0.5  | 0.75 | 1    | 0.25 | 0.5  | 0.75 | 0.25 | 0.5  | 0.75 | 0.25 | 0.5  | 0.75 | 0    | 0.25 | 0.5  | 0.5  | 0.75 | 1    |
| R5  | 0.75 | 1    | 1    | 0.25 | 0.5  | 0.75 | 0.5  | 0.75 | 1    | 0.5  | 0.75 | 1    | 0    | 0.25 | 0.5  | 0.5  | 0.75 | 1    | 0.75 | 1    | 1    |
| R6  | 0.25 | 0.5  | 0.75 | 0.25 | 0.5  | 0.75 | 0.5  | 0.75 | 1    | 0.25 | 0.5  | 0.75 | 0    | 0.25 | 0.5  | 0.25 | 0.5  | 0.75 | 0    | 0.25 | 0.5  |
| R7  | 0.75 | 1    | 1    | 0.5  | 0.75 | 1    | 0.25 | 0.5  | 0.75 | 0    | 0.25 | 0.5  | 0    | 0    | 0.25 | 0    | 0.25 | 0.5  | 0.5  | 0.75 | 1    |
| R8  | 0.5  | 0.75 | 1    | 0.5  | 0.75 | 1    | 0.5  | 0.75 | 1    | 0.5  | 0.75 | 1    | 0.5  | 0.75 | 1    | 0.25 | 0.5  | 0.75 | 0.25 | 0.5  | 0.75 |
| R9  | 0.75 | 1    | 1    | 0.5  | 0.75 | 1    | 0.5  | 0.75 | 1    | 0.5  | 0.75 | 1    | 0.25 | 0.5  | 0.75 | 0.25 | 0.5  | 0.75 | 0.25 | 0.5  | 0.75 |
| R10 | 0.5  | 0.75 | 1    | 0.5  | 0.75 | 1    | 0.5  | 0.75 | 1    | 0.5  | 0.75 | 1    | 0.5  | 0.75 | 1    | 0.5  | 0.75 | 1    | 0.5  | 0.75 | 1    |
| R11 | 0.25 | 0.5  | 0.75 | 0.5  | 0.75 | 1    | 0.25 | 0.5  | 0.75 | 0.25 | 0.5  | 0.75 | 0    | 0.25 | 0.5  | 0.25 | 0.5  | 0.75 | 0.25 | 0.5  | 0.75 |
| R12 | 0.25 | 0.5  | 0.75 | 0.5  | 0.75 | 1    | 0.5  | 0.75 | 1    | 0.25 | 0.5  | 0.75 | 0.25 | 0.5  | 0.75 | 0.5  | 0.75 | 1    | 0.25 | 0.5  | 0.75 |
| R13 | 0.5  | 0.75 | 1    | 0.75 | 1    | 1    | 0.5  | 0.75 | 1    | 0.5  | 0.75 | 1    | 0.25 | 0.5  | 0.75 | 0.5  | 0.75 | 1    | 0.5  | 0.75 | 1    |
| R14 | 0    | 0.25 | 0.5  | 0    | 0.25 | 0.5  | 0.25 | 0.5  | 0.75 | 0.25 | 0.5  | 0.75 | 0    | 0.25 | 0.5  | 0    | 0.25 | 0.5  | 0    | 0.25 | 0.5  |
| R15 | 0.25 | 0.5  | 0.75 | 0    | 0.25 | 0.5  | 0    | 0.25 | 0.5  | 0    | 0.25 | 0.5  | 0    | 0    | 0.25 | 0.25 | 0.5  | 0.75 | 0    | 0.25 | 0.5  |
| R16 | 0    | 0.25 | 0.5  | 0.5  | 0.75 | 1    | 0.25 | 0.5  | 0.75 | 0.25 | 0.5  | 0.75 | 0    | 0.25 | 0.5  | 0    | 0.25 | 0.5  | 0    | 0.25 | 0.5  |
| R17 | 0.25 | 0.5  | 0.75 | 0    | 0.25 | 0.5  | 0    | 0.25 | 0.5  | 0    | 0.25 | 0.5  | 0    | 0.25 | 0.5  | 0    | 0.25 | 0.5  | 0    | 0.25 | 0.5  |
| R18 | 0.25 | 0.5  | 0.75 | 0.5  | 0.75 | 1    | 0.25 | 0.5  | 0.75 | 0.5  | 0.75 | 1    | 0.5  | 0.75 | 1    | 0.5  | 0.75 | 1    | 0.25 | 0.5  | 0.75 |
| R19 | 0.5  | 0.75 | 1    | 0.25 | 0.5  | 0.75 | 0    | 0.25 | 0.5  | 0.25 | 0.5  | 0.75 | 0    | 0.25 | 0.5  | 0.25 | 0.5  | 0.75 | 0    | 0.25 | 0.5  |
| R20 | 0.75 | 1    | 1    | 0.75 | 1    | 1    | 0.75 | 1    | 1    | 0.5  | 0.75 | 1    | 0.5  | 0.75 | 1    | 0.5  | 0.75 | 1    | 0.75 | 1    | 1    |
| R21 | 0.25 | 0.5  | 0.75 | 0.25 | 0.5  | 0.75 | 0.25 | 0.5  | 0.75 | 0.25 | 0.5  | 0.75 | 0.5  | 0.75 | 1    | 0.5  | 0.75 | 1    | 0.25 | 0.5  | 0.75 |
| R22 | 0    | 0.25 | 0.5  | 0.25 | 0.5  | 0.75 | 0.25 | 0.5  | 0.75 | 0    | 0.25 | 0.5  | 0    | 0.25 | 0.5  | 0    | 0.25 | 0.5  | 0    | 0    | 0.25 |

**Table S2.** Vector  $\tilde{E}$  representing the fuzzy weights of the respondents for LIs.

| #   | Classification |      |      | Group |
|-----|----------------|------|------|-------|
| R1  | 0.00           | 0.50 | 1.00 | N2    |
| R2  | 0.50           | 1.00 | 1.00 | N3    |
| R3  | 0.00           | 0.50 | 1.00 | N2    |
| R4  | 0.00           | 0.50 | 1.00 | N2    |
| R5  | 0.00           | 0.00 | 0.50 | N1    |
| R6  | 0.00           | 0.50 | 1.00 | N2    |
| R7  | 0.00           | 0.50 | 1.00 | N2    |
| R8  | 0.00           | 0.50 | 1.00 | N2    |
| R9  | 0.00           | 0.50 | 1.00 | N2    |
| R10 | 0.00           | 0.00 | 0.50 | N1    |
| R11 | 0.00           | 0.00 | 0.50 | N1    |
| R12 | 0.50           | 1.00 | 1.00 | N3    |
| R13 | 0.50           | 1.00 | 1.00 | N3    |
| R14 | 0.00           | 0.50 | 1.00 | N2    |
| R15 | 0.00           | 0.50 | 1.00 | N2    |
| R16 | 0.00           | 0.00 | 0.50 | N1    |
| R17 | 0.50           | 1.00 | 1.00 | N3    |
| R18 | 0.00           | 0.50 | 1.00 | N2    |
| R19 | 0.00           | 0.00 | 0.50 | N1    |
| R20 | 0.00           | 0.00 | 0.50 | N1    |
| R21 | 0.50           | 1.00 | 1.00 | N3    |
| R22 | 0.00           | 0.50 | 1.00 | N2    |

**Table S3.** Matrix  $\mathcal{R}$  containing the scores assigned by respondents in the fuzzy triangular form normalized based on the highest score value for LIs.

| #   | P1   |      |      | P2   |      |      | P3   |      |      | P4   |      |      | P5   |      |      | P6   |      |      | P7   |      |      | P8   |      |      | P9   |      |      | P10  |      |      |
|-----|------|------|------|------|------|------|------|------|------|------|------|------|------|------|------|------|------|------|------|------|------|------|------|------|------|------|------|------|------|------|
| R1  | 0.75 | 1.00 | 1.00 | 0.75 | 1.00 | 1.00 | 0.75 | 1.00 | 1.00 | 0.75 | 1.00 | 1.00 | 0.75 | 1.00 | 1.00 | 0.50 | 0.75 | 1.00 | 0.75 | 1.00 | 1.00 | 0.75 | 1.00 | 1.00 | 0.50 | 0.75 | 1.00 | 0.75 | 1.00 | 1.00 |
| R2  | 0.50 | 0.75 | 1.00 | 0.50 | 0.75 | 1.00 | 0.75 | 1.00 | 1.00 | 0.50 | 0.75 | 1.00 | 0.25 | 0.50 | 0.75 | 0.25 | 0.50 | 0.75 | 0.50 | 0.75 | 1.00 | 0.00 | 0.25 | 0.50 | 0.25 | 0.50 | 0.75 | 0.25 | 0.50 | 0.75 |
| R3  | 0.50 | 0.75 | 1.00 | 0.50 | 0.75 | 1.00 | 0.50 | 0.75 | 1.00 | 0.50 | 0.75 | 1.00 | 0.25 | 0.50 | 0.75 | 0.50 | 0.75 | 1.00 | 0.50 | 0.75 | 1.00 | 0.25 | 0.50 | 0.75 | 0.50 | 0.75 | 1.00 | 0.50 | 0.75 | 1.00 |
| R4  | 0.50 | 0.75 | 1.00 | 0.50 | 0.75 | 1.00 | 0.50 | 0.75 | 1.00 | 0.25 | 0.50 | 0.75 | 0.25 | 0.50 | 0.75 | 0.50 | 0.75 | 1.00 | 0.25 | 0.50 | 0.75 | 0.25 | 0.50 | 0.75 | 0.25 | 0.50 | 0.75 | 0.25 | 0.50 | 0.75 |
| R5  | 0.50 | 0.75 | 1.00 | 0.75 | 1.00 | 1.00 | 0.50 | 0.75 | 1.00 | 0.50 | 0.75 | 1.00 | 0.50 | 0.75 | 1.00 | 0.75 | 1.00 | 1.00 | 0.50 | 0.75 | 1.00 | 0.50 | 0.75 | 1.00 | 0.50 | 0.75 | 1.00 | 0.75 | 1.00 | 1.00 |
| R6  | 0.50 | 0.75 | 1.00 | 0.25 | 0.50 | 0.75 | 0.50 | 0.75 | 1.00 | 0.25 | 0.50 | 0.75 | 0.25 | 0.50 | 0.75 | 0.25 | 0.50 | 0.75 | 0.50 | 0.75 | 1.00 | 0.25 | 0.50 | 0.75 | 0.50 | 0.75 | 1.00 | 0.25 | 0.50 | 0.75 |
| R7  | 0.50 | 0.75 | 1.00 | 0.50 | 0.75 | 1.00 | 0.50 | 0.75 | 1.00 | 0.50 | 0.75 | 1.00 | 0.25 | 0.50 | 0.75 | 0.25 | 0.50 | 0.75 | 0.00 | 0.25 | 0.50 | 0.00 | 0.25 | 0.50 | 0.25 | 0.50 | 0.75 | 0.75 | 1.00 | 1.00 |
| R8  | 0.75 | 1.00 | 1.00 | 0.25 | 0.50 | 0.75 | 0.50 | 0.75 | 1.00 | 0.75 | 1.00 | 1.00 | 0.50 | 0.75 | 1.00 | 0.75 | 1.00 | 1.00 | 0.50 | 0.75 | 1.00 | 0.25 | 0.50 | 0.75 | 0.75 | 1.00 | 1.00 | 0.50 | 0.75 | 1.00 |
| R9  | 0.50 | 0.75 | 1.00 | 0.50 | 0.75 | 1.00 | 0.50 | 0.75 | 1.00 | 0.50 | 0.75 | 1.00 | 0.50 | 0.75 | 1.00 | 0.25 | 0.50 | 0.75 | 0.50 | 0.75 | 1.00 | 0.50 | 0.75 | 1.00 | 0.25 | 0.50 | 0.75 | 0.75 | 1.00 | 1.00 |
| R10 | 0.25 | 0.50 | 0.75 | 0.50 | 0.75 | 1.00 | 0.50 | 0.75 | 1.00 | 0.50 | 0.75 | 1.00 | 0.50 | 0.75 | 1.00 | 0.50 | 0.75 | 1.00 | 0.50 | 0.75 | 1.00 | 0.50 | 0.75 | 1.00 | 0.50 | 0.75 | 1.00 | 0.50 | 0.75 | 1.00 |
| R11 | 0.50 | 0.75 | 1.00 | 0.50 | 0.75 | 1.00 | 0.50 | 0.75 | 1.00 | 0.50 | 0.75 | 1.00 | 0.50 | 0.75 | 1.00 | 0.50 | 0.75 | 1.00 | 0.25 | 0.50 | 0.75 | 0.25 | 0.50 | 0.75 | 0.25 | 0.50 | 0.75 | 0.25 | 0.50 | 0.75 |
| R12 | 0.50 | 0.75 | 1.00 | 0.50 | 0.75 | 1.00 | 0.50 | 0.75 | 1.00 | 0.50 | 0.75 | 1.00 | 0.50 | 0.75 | 1.00 | 0.25 | 0.50 | 0.75 | 0.50 | 0.75 | 1.00 | 0.25 | 0.50 | 0.75 | 0.00 | 0.25 | 0.50 | 0.25 | 0.50 | 0.75 |
| R13 | 0.50 | 0.75 | 1.00 | 0.50 | 0.75 | 1.00 | 0.50 | 0.75 | 1.00 | 0.50 | 0.75 | 1.00 | 0.50 | 0.75 | 1.00 | 0.25 | 0.50 | 0.75 | 0.50 | 0.75 | 1.00 | 0.50 | 0.75 | 1.00 | 0.50 | 0.75 | 1.00 | 0.50 | 0.75 | 1.00 |
| R14 | 0.33 | 0.67 | 1.00 | 0.33 | 0.67 | 1.00 | 0.33 | 0.67 | 1.00 | 0.00 | 0.33 | 0.67 | 0.00 | 0.33 | 0.67 | 0.00 | 0.33 | 0.67 | 0.00 | 0.33 | 0.67 | 0.00 | 0.33 | 0.67 | 0.00 | 0.33 | 0.67 | 0.00 | 0.33 | 0.67 |
| R15 | 0.25 | 0.50 | 0.75 | 0.25 | 0.50 | 0.75 | 0.50 | 0.75 | 1.00 | 0.25 | 0.50 | 0.75 | 0.25 | 0.50 | 0.75 | 0.25 | 0.50 | 0.75 | 0.25 | 0.50 | 0.75 | 0.25 | 0.50 | 0.75 | 0.25 | 0.50 | 0.75 | 0.25 | 0.50 | 0.75 |
| R16 | 0.50 | 0.75 | 1.00 | 0.25 | 0.50 | 0.75 | 0.50 | 0.75 | 1.00 | 0.50 | 0.75 | 1.00 | 0.25 | 0.50 | 0.75 | 0.50 | 0.75 | 1.00 | 0.25 | 0.50 | 0.75 | 0.25 | 0.50 | 0.75 | 0.25 | 0.50 | 0.75 | 0.00 | 0.25 | 0.50 |
| R17 | 0.33 | 0.67 | 1.00 | 0.33 | 0.67 | 1.00 | 0.33 | 0.67 | 1.00 | 0.33 | 0.67 | 1.00 | 0.33 | 0.67 | 1.00 | 0.00 | 0.33 | 0.67 | 0.33 | 0.67 | 1.00 | 0.33 | 0.67 | 1.00 | 0.00 | 0.33 | 0.67 | 0.33 | 0.67 | 1.00 |
| R18 | 0.25 | 0.50 | 0.75 | 0.25 | 0.50 | 0.75 | 0.25 | 0.50 | 0.75 | 0.25 | 0.50 | 0.75 | 0.50 | 0.75 | 1.00 | 0.50 | 0.75 | 1.00 | 0.50 | 0.75 | 1.00 | 0.25 | 0.50 | 0.75 | 0.50 | 0.75 | 1.00 | 0.25 | 0.50 | 0.75 |
| R19 | 0.25 | 0.50 | 0.75 | 0.25 | 0.50 | 0.75 | 0.25 | 0.50 | 0.75 | 0.25 | 0.50 | 0.75 | 0.00 | 0.25 | 0.50 | 0.00 | 0.25 | 0.50 | 0.25 | 0.50 | 0.75 | 0.00 | 0.25 | 0.50 | 0.25 | 0.50 | 0.75 | 0.50 | 0.75 | 1.00 |
| R20 | 0.75 | 1.00 | 1.00 | 0.75 | 1.00 | 1.00 | 0.75 | 1.00 | 1.00 | 0.50 | 0.75 | 1.00 | 0.75 | 1.00 | 1.00 | 0.75 | 1.00 | 1.00 | 0.50 | 0.75 | 1.00 | 0.50 | 0.75 | 1.00 | 0.50 | 0.75 | 1.00 | 0.75 | 1.00 | 1.00 |
| R21 | 0.75 | 1.00 | 1.00 | 0.50 | 0.75 | 1.00 | 0.75 | 1.00 | 1.00 | 0.75 | 1.00 | 1.00 | 0.25 | 0.50 | 0.75 | 0.25 | 0.50 | 0.75 | 0.50 | 0.75 | 1.00 | 0.00 | 0.25 | 0.50 | 0.25 | 0.50 | 0.75 | 0.25 | 0.50 | 0.75 |
| R22 | 0.25 | 0.50 | 0.75 | 0.25 | 0.50 | 0.75 | 0.25 | 0.50 | 0.75 | 0.25 | 0.50 | 0.75 | 0.50 | 0.75 | 1.00 | 0.25 | 0.50 | 0.75 | 0.25 | 0.50 | 0.75 | 0.50 | 0.75 | 1.00 | 0.25 | 0.50 | 0.75 | 0.00 | 0.25 | 0.50 |

(Table S3 - Continues)

(Table S3 - Ends)

| #   | P11  |      |      | P12  |      |      | P13  |      |      | P14  |      |      | P15  |      |      | P16  |      |      |
|-----|------|------|------|------|------|------|------|------|------|------|------|------|------|------|------|------|------|------|
| R1  | 0.75 | 1.00 | 1.00 | 0.75 | 1.00 | 1.00 | 0.75 | 1.00 | 1.00 | 0.75 | 1.00 | 1.00 | 0.75 | 1.00 | 1.00 | 0.75 | 1.00 | 1.00 |
| R2  | 0.50 | 0.75 | 1.00 | 0.25 | 0.50 | 0.75 | 0.25 | 0.50 | 0.75 | 0.50 | 0.75 | 1.00 | 0.50 | 0.75 | 1.00 | 0.50 | 0.75 | 1.00 |
| R3  | 0.50 | 0.75 | 1.00 | 0.75 | 1.00 | 1.00 | 0.25 | 0.50 | 0.75 | 0.00 | 0.25 | 0.50 | 0.25 | 0.50 | 0.75 | 0.50 | 0.75 | 1.00 |
| R4  | 0.50 | 0.75 | 1.00 | 0.25 | 0.50 | 0.75 | 0.25 | 0.50 | 0.75 | 0.25 | 0.50 | 0.75 | 0.00 | 0.25 | 0.50 | 0.50 | 0.75 | 1.00 |
| R5  | 0.25 | 0.50 | 0.75 | 0.50 | 0.75 | 1.00 | 0.50 | 0.75 | 1.00 | 0.00 | 0.25 | 0.50 | 0.50 | 0.75 | 1.00 | 0.75 | 1.00 | 1.00 |
| R6  | 0.25 | 0.50 | 0.75 | 0.50 | 0.75 | 1.00 | 0.25 | 0.50 | 0.75 | 0.00 | 0.25 | 0.50 | 0.25 | 0.50 | 0.75 | 0.00 | 0.25 | 0.50 |
| R7  | 0.50 | 0.75 | 1.00 | 0.25 | 0.50 | 0.75 | 0.00 | 0.25 | 0.50 | 0.00 | 0.00 | 0.25 | 0.00 | 0.25 | 0.50 | 0.50 | 0.75 | 1.00 |
| R8  | 0.50 | 0.75 | 1.00 | 0.50 | 0.75 | 1.00 | 0.50 | 0.75 | 1.00 | 0.50 | 0.75 | 1.00 | 0.25 | 0.50 | 0.75 | 0.25 | 0.50 | 0.75 |
| R9  | 0.50 | 0.75 | 1.00 | 0.50 | 0.75 | 1.00 | 0.50 | 0.75 | 1.00 | 0.25 | 0.50 | 0.75 | 0.25 | 0.50 | 0.75 | 0.25 | 0.50 | 0.75 |
| R10 | 0.50 | 0.75 | 1.00 | 0.50 | 0.75 | 1.00 | 0.50 | 0.75 | 1.00 | 0.50 | 0.75 | 1.00 | 0.50 | 0.75 | 1.00 | 0.50 | 0.75 | 1.00 |
| R11 | 0.50 | 0.75 | 1.00 | 0.25 | 0.50 | 0.75 | 0.25 | 0.50 | 0.75 | 0.00 | 0.25 | 0.50 | 0.25 | 0.50 | 0.75 | 0.25 | 0.50 | 0.75 |
| R12 | 0.50 | 0.75 | 1.00 | 0.50 | 0.75 | 1.00 | 0.25 | 0.50 | 0.75 | 0.25 | 0.50 | 0.75 | 0.50 | 0.75 | 1.00 | 0.25 | 0.50 | 0.75 |
| R13 | 0.75 | 1.00 | 1.00 | 0.50 | 0.75 | 1.00 | 0.50 | 0.75 | 1.00 | 0.25 | 0.50 | 0.75 | 0.50 | 0.75 | 1.00 | 0.50 | 0.75 | 1.00 |
| R14 | 0.00 | 0.33 | 0.67 | 0.33 | 0.67 | 1.00 | 0.33 | 0.67 | 1.00 | 0.00 | 0.33 | 0.67 | 0.00 | 0.33 | 0.67 | 0.00 | 0.33 | 0.67 |
| R15 | 0.00 | 0.25 | 0.50 | 0.00 | 0.25 | 0.50 | 0.00 | 0.25 | 0.50 | 0.00 | 0.00 | 0.25 | 0.25 | 0.50 | 0.75 | 0.00 | 0.25 | 0.50 |
| R16 | 0.50 | 0.75 | 1.00 | 0.25 | 0.50 | 0.75 | 0.25 | 0.50 | 0.75 | 0.00 | 0.25 | 0.50 | 0.00 | 0.25 | 0.50 | 0.00 | 0.25 | 0.50 |
| R17 | 0.00 | 0.33 | 0.67 | 0.00 | 0.33 | 0.67 | 0.00 | 0.33 | 0.67 | 0.00 | 0.33 | 0.67 | 0.00 | 0.33 | 0.67 | 0.00 | 0.33 | 0.67 |
| R18 | 0.50 | 0.75 | 1.00 | 0.25 | 0.50 | 0.75 | 0.50 | 0.75 | 1.00 | 0.50 | 0.75 | 1.00 | 0.50 | 0.75 | 1.00 | 0.25 | 0.50 | 0.75 |
| R19 | 0.25 | 0.50 | 0.75 | 0.00 | 0.25 | 0.50 | 0.25 | 0.50 | 0.75 | 0.00 | 0.25 | 0.50 | 0.25 | 0.50 | 0.75 | 0.00 | 0.25 | 0.50 |
| R20 | 0.75 | 1.00 | 1.00 | 0.75 | 1.00 | 1.00 | 0.50 | 0.75 | 1.00 | 0.50 | 0.75 | 1.00 | 0.50 | 0.75 | 1.00 | 0.75 | 1.00 | 1.00 |
| R21 | 0.25 | 0.50 | 0.75 | 0.25 | 0.50 | 0.75 | 0.25 | 0.50 | 0.75 | 0.50 | 0.75 | 1.00 | 0.50 | 0.75 | 1.00 | 0.25 | 0.50 | 0.75 |
| R22 | 0.25 | 0.50 | 0.75 | 0.25 | 0.50 | 0.75 | 0.00 | 0.25 | 0.50 | 0.00 | 0.25 | 0.50 | 0.00 | 0.25 | 0.50 | 0.00 | 0.00 | 0.25 |

**Table S4.** Matrix U resulted from matrix  $\mathcal{R}$  weighted by the vector  $\tilde{E}$  for LIs.

| #   | P1   |      |      | P2   |      |      | P3   |      |      | P4   |      |      | P5   |      |      | P6   |      |      | P7   |      |      | P8   |      |      | P9   |      |      | P10  |      |      |
|-----|------|------|------|------|------|------|------|------|------|------|------|------|------|------|------|------|------|------|------|------|------|------|------|------|------|------|------|------|------|------|
| R1  | 0.00 | 0.50 | 1.00 | 0.00 | 0.50 | 1.00 | 0.00 | 0.50 | 1.00 | 0.00 | 0.50 | 1.00 | 0.00 | 0.50 | 1.00 | 0.00 | 0.38 | 1.00 | 0.00 | 0.50 | 1.00 | 0.00 | 0.50 | 1.00 | 0.00 | 0.38 | 1.00 | 0.00 | 0.50 | 1.00 |
| R2  | 0.25 | 0.75 | 1.00 | 0.25 | 0.75 | 1.00 | 0.38 | 1.00 | 1.00 | 0.25 | 0.75 | 1.00 | 0.13 | 0.50 | 0.75 | 0.13 | 0.50 | 0.75 | 0.25 | 0.75 | 1.00 | 0.00 | 0.25 | 0.50 | 0.13 | 0.50 | 0.75 | 0.13 | 0.50 | 0.75 |
| R3  | 0.00 | 0.38 | 1.00 | 0.00 | 0.38 | 1.00 | 0.00 | 0.38 | 1.00 | 0.00 | 0.38 | 1.00 | 0.00 | 0.25 | 0.75 | 0.00 | 0.38 | 1.00 | 0.00 | 0.38 | 1.00 | 0.00 | 0.25 | 0.75 | 0.00 | 0.38 | 1.00 | 0.00 | 0.38 | 1.00 |
| R4  | 0.00 | 0.38 | 1.00 | 0.00 | 0.38 | 1.00 | 0.00 | 0.38 | 1.00 | 0.00 | 0.25 | 0.75 | 0.00 | 0.25 | 0.75 | 0.00 | 0.38 | 1.00 | 0.00 | 0.25 | 0.75 | 0.00 | 0.25 | 0.75 | 0.00 | 0.25 | 0.75 | 0.00 | 0.25 | 0.75 |
| R5  | 0.00 | 0.00 | 0.50 | 0.00 | 0.00 | 0.50 | 0.00 | 0.00 | 0.50 | 0.00 | 0.00 | 0.50 | 0.00 | 0.00 | 0.50 | 0.00 | 0.00 | 0.50 | 0.00 | 0.00 | 0.50 | 0.00 | 0.00 | 0.50 | 0.00 | 0.00 | 0.50 | 0.00 | 0.00 | 0.50 |
| R6  | 0.00 | 0.38 | 1.00 | 0.00 | 0.25 | 0.75 | 0.00 | 0.38 | 1.00 | 0.00 | 0.25 | 0.75 | 0.00 | 0.25 | 0.75 | 0.00 | 0.25 | 0.75 | 0.00 | 0.38 | 1.00 | 0.00 | 0.25 | 0.75 | 0.00 | 0.38 | 1.00 | 0.00 | 0.25 | 0.75 |
| R7  | 0.00 | 0.38 | 1.00 | 0.00 | 0.38 | 1.00 | 0.00 | 0.38 | 1.00 | 0.00 | 0.38 | 1.00 | 0.00 | 0.25 | 0.75 | 0.00 | 0.25 | 0.75 | 0.00 | 0.13 | 0.50 | 0.00 | 0.13 | 0.50 | 0.00 | 0.25 | 0.75 | 0.00 | 0.50 | 1.00 |
| R8  | 0.00 | 0.50 | 1.00 | 0.00 | 0.25 | 0.75 | 0.00 | 0.38 | 1.00 | 0.00 | 0.50 | 1.00 | 0.00 | 0.38 | 1.00 | 0.00 | 0.50 | 1.00 | 0.00 | 0.38 | 1.00 | 0.00 | 0.25 | 0.75 | 0.00 | 0.50 | 1.00 | 0.00 | 0.38 | 1.00 |
| R9  | 0.00 | 0.38 | 1.00 | 0.00 | 0.38 | 1.00 | 0.00 | 0.38 | 1.00 | 0.00 | 0.38 | 1.00 | 0.00 | 0.38 | 1.00 | 0.00 | 0.25 | 0.75 | 0.00 | 0.38 | 1.00 | 0.00 | 0.38 | 1.00 | 0.00 | 0.25 | 0.75 | 0.00 | 0.50 | 1.00 |
| R10 | 0.00 | 0.00 | 0.38 | 0.00 | 0.00 | 0.50 | 0.00 | 0.00 | 0.50 | 0.00 | 0.00 | 0.50 | 0.00 | 0.00 | 0.50 | 0.00 | 0.00 | 0.50 | 0.00 | 0.00 | 0.50 | 0.00 | 0.00 | 0.50 | 0.00 | 0.00 | 0.50 | 0.00 | 0.00 | 0.50 |
| R11 | 0.00 | 0.00 | 0.50 | 0.00 | 0.00 | 0.50 | 0.00 | 0.00 | 0.50 | 0.00 | 0.00 | 0.50 | 0.00 | 0.00 | 0.50 | 0.00 | 0.00 | 0.50 | 0.00 | 0.00 | 0.38 | 0.00 | 0.00 | 0.38 | 0.00 | 0.00 | 0.38 | 0.00 | 0.00 | 0.38 |
| R12 | 0.25 | 0.75 | 1.00 | 0.25 | 0.75 | 1.00 | 0.25 | 0.75 | 1.00 | 0.25 | 0.75 | 1.00 | 0.25 | 0.75 | 1.00 | 0.13 | 0.50 | 0.75 | 0.25 | 0.75 | 1.00 | 0.13 | 0.50 | 0.75 | 0.00 | 0.25 | 0.50 | 0.13 | 0.50 | 0.75 |
| R13 | 0.25 | 0.75 | 1.00 | 0.25 | 0.75 | 1.00 | 0.25 | 0.75 | 1.00 | 0.25 | 0.75 | 1.00 | 0.25 | 0.75 | 1.00 | 0.13 | 0.50 | 0.75 | 0.25 | 0.75 | 1.00 | 0.25 | 0.75 | 1.00 | 0.25 | 0.75 | 1.00 | 0.25 | 0.75 | 1.00 |
| R14 | 0.00 | 0.33 | 1.00 | 0.00 | 0.33 | 1.00 | 0.00 | 0.33 | 1.00 | 0.00 | 0.17 | 0.67 | 0.00 | 0.17 | 0.67 | 0.00 | 0.17 | 0.67 | 0.00 | 0.17 | 0.67 | 0.00 | 0.17 | 0.67 | 0.00 | 0.17 | 0.67 | 0.00 | 0.17 | 0.67 |
| R15 | 0.00 | 0.25 | 0.75 | 0.00 | 0.25 | 0.75 | 0.00 | 0.38 | 1.00 | 0.00 | 0.25 | 0.75 | 0.00 | 0.25 | 0.75 | 0.00 | 0.25 | 0.75 | 0.00 | 0.25 | 0.75 | 0.00 | 0.25 | 0.75 | 0.00 | 0.25 | 0.75 | 0.00 | 0.25 | 0.75 |
| R16 | 0.00 | 0.00 | 0.50 | 0.00 | 0.00 | 0.38 | 0.00 | 0.00 | 0.50 | 0.00 | 0.00 | 0.50 | 0.00 | 0.00 | 0.38 | 0.00 | 0.00 | 0.50 | 0.00 | 0.00 | 0.38 | 0.00 | 0.00 | 0.38 | 0.00 | 0.00 | 0.38 | 0.00 | 0.00 | 0.25 |
| R17 | 0.17 | 0.67 | 1.00 | 0.17 | 0.67 | 1.00 | 0.17 | 0.67 | 1.00 | 0.17 | 0.67 | 1.00 | 0.17 | 0.67 | 1.00 | 0.00 | 0.33 | 0.67 | 0.17 | 0.67 | 1.00 | 0.17 | 0.67 | 1.00 | 0.00 | 0.33 | 0.67 | 0.17 | 0.67 | 1.00 |
| R18 | 0.00 | 0.25 | 0.75 | 0.00 | 0.25 | 0.75 | 0.00 | 0.25 | 0.75 | 0.00 | 0.25 | 0.75 | 0.00 | 0.38 | 1.00 | 0.00 | 0.38 | 1.00 | 0.00 | 0.38 | 1.00 | 0.00 | 0.25 | 0.75 | 0.00 | 0.38 | 1.00 | 0.00 | 0.25 | 0.75 |
| R19 | 0.00 | 0.00 | 0.38 | 0.00 | 0.00 | 0.38 | 0.00 | 0.00 | 0.38 | 0.00 | 0.00 | 0.38 | 0.00 | 0.00 | 0.25 | 0.00 | 0.00 | 0.25 | 0.00 | 0.00 | 0.38 | 0.00 | 0.00 | 0.25 | 0.00 | 0.00 | 0.38 | 0.00 | 0.00 | 0.50 |
| R20 | 0.00 | 0.00 | 0.50 | 0.00 | 0.00 | 0.50 | 0.00 | 0.00 | 0.50 | 0.00 | 0.00 | 0.50 | 0.00 | 0.00 | 0.50 | 0.00 | 0.00 | 0.50 | 0.00 | 0.00 | 0.50 | 0.00 | 0.00 | 0.50 | 0.00 | 0.00 | 0.50 | 0.00 | 0.00 | 0.50 |
| R21 | 0.38 | 1.00 | 1.00 | 0.25 | 0.75 | 1.00 | 0.38 | 1.00 | 1.00 | 0.38 | 1.00 | 1.00 | 0.13 | 0.50 | 0.75 | 0.13 | 0.50 | 0.75 | 0.25 | 0.75 | 1.00 | 0.00 | 0.25 | 0.50 | 0.13 | 0.50 | 0.75 | 0.13 | 0.50 | 0.75 |
| R22 | 0.00 | 0.25 | 0.75 | 0.00 | 0.25 | 0.75 | 0.00 | 0.25 | 0.75 | 0.00 | 0.25 | 0.75 | 0.00 | 0.38 | 1.00 | 0.00 | 0.25 | 0.75 | 0.00 | 0.25 | 0.75 | 0.00 | 0.38 | 1.00 | 0.00 | 0.25 | 0.75 | 0.00 | 0.13 | 0.50 |

(Table S4 - Continues)

(Table S4 - Ends)

| #   | P11  |      |      | P12  |      |      | P13  |      |      | P14  |      |      | P15  |      |      | P16  |      |      |
|-----|------|------|------|------|------|------|------|------|------|------|------|------|------|------|------|------|------|------|
| R1  | 0.00 | 0.50 | 1.00 | 0.00 | 0.50 | 1.00 | 0.00 | 0.50 | 1.00 | 0.00 | 0.50 | 1.00 | 0.00 | 0.50 | 1.00 | 0.00 | 0.50 | 1.00 |
| R2  | 0.25 | 0.75 | 1.00 | 0.13 | 0.50 | 0.75 | 0.13 | 0.50 | 0.75 | 0.25 | 0.75 | 1.00 | 0.25 | 0.75 | 1.00 | 0.25 | 0.75 | 1.00 |
| R3  | 0.00 | 0.38 | 1.00 | 0.00 | 0.50 | 1.00 | 0.00 | 0.25 | 0.75 | 0.00 | 0.13 | 0.50 | 0.00 | 0.25 | 0.75 | 0.00 | 0.38 | 1.00 |
| R4  | 0.00 | 0.38 | 1.00 | 0.00 | 0.25 | 0.75 | 0.00 | 0.25 | 0.75 | 0.00 | 0.25 | 0.75 | 0.00 | 0.13 | 0.50 | 0.00 | 0.38 | 1.00 |
| R5  | 0.00 | 0.00 | 0.38 | 0.00 | 0.00 | 0.50 | 0.00 | 0.00 | 0.50 | 0.00 | 0.00 | 0.25 | 0.00 | 0.00 | 0.50 | 0.00 | 0.00 | 0.50 |
| R6  | 0.00 | 0.25 | 0.75 | 0.00 | 0.38 | 1.00 | 0.00 | 0.25 | 0.75 | 0.00 | 0.13 | 0.50 | 0.00 | 0.25 | 0.75 | 0.00 | 0.13 | 0.50 |
| R7  | 0.00 | 0.38 | 1.00 | 0.00 | 0.25 | 0.75 | 0.00 | 0.13 | 0.50 | 0.00 | 0.00 | 0.25 | 0.00 | 0.13 | 0.50 | 0.00 | 0.38 | 1.00 |
| R8  | 0.00 | 0.38 | 1.00 | 0.00 | 0.38 | 1.00 | 0.00 | 0.38 | 1.00 | 0.00 | 0.38 | 1.00 | 0.00 | 0.25 | 0.75 | 0.00 | 0.25 | 0.75 |
| R9  | 0.00 | 0.38 | 1.00 | 0.00 | 0.38 | 1.00 | 0.00 | 0.38 | 1.00 | 0.00 | 0.25 | 0.75 | 0.00 | 0.25 | 0.75 | 0.00 | 0.25 | 0.75 |
| R10 | 0.00 | 0.00 | 0.50 | 0.00 | 0.00 | 0.50 | 0.00 | 0.00 | 0.50 | 0.00 | 0.00 | 0.50 | 0.00 | 0.00 | 0.50 | 0.00 | 0.00 | 0.50 |
| R11 | 0.00 | 0.00 | 0.50 | 0.00 | 0.00 | 0.38 | 0.00 | 0.00 | 0.38 | 0.00 | 0.00 | 0.25 | 0.00 | 0.00 | 0.38 | 0.00 | 0.00 | 0.38 |
| R12 | 0.25 | 0.75 | 1.00 | 0.25 | 0.75 | 1.00 | 0.13 | 0.50 | 0.75 | 0.13 | 0.50 | 0.75 | 0.25 | 0.75 | 1.00 | 0.13 | 0.50 | 0.75 |
| R13 | 0.38 | 1.00 | 1.00 | 0.25 | 0.75 | 1.00 | 0.25 | 0.75 | 1.00 | 0.13 | 0.50 | 0.75 | 0.25 | 0.75 | 1.00 | 0.25 | 0.75 | 1.00 |
| R14 | 0.00 | 0.17 | 0.67 | 0.00 | 0.33 | 1.00 | 0.00 | 0.33 | 1.00 | 0.00 | 0.17 | 0.67 | 0.00 | 0.17 | 0.67 | 0.00 | 0.17 | 0.67 |
| R15 | 0.00 | 0.13 | 0.50 | 0.00 | 0.13 | 0.50 | 0.00 | 0.13 | 0.50 | 0.00 | 0.00 | 0.25 | 0.00 | 0.25 | 0.75 | 0.00 | 0.13 | 0.50 |
| R16 | 0.00 | 0.00 | 0.50 | 0.00 | 0.00 | 0.38 | 0.00 | 0.00 | 0.38 | 0.00 | 0.00 | 0.25 | 0.00 | 0.00 | 0.25 | 0.00 | 0.00 | 0.25 |
| R17 | 0.00 | 0.33 | 0.67 | 0.00 | 0.33 | 0.67 | 0.00 | 0.33 | 0.67 | 0.00 | 0.33 | 0.67 | 0.00 | 0.33 | 0.67 | 0.00 | 0.33 | 0.67 |
| R18 | 0.00 | 0.38 | 1.00 | 0.00 | 0.25 | 0.75 | 0.00 | 0.38 | 1.00 | 0.00 | 0.38 | 1.00 | 0.00 | 0.38 | 1.00 | 0.00 | 0.25 | 0.75 |
| R19 | 0.00 | 0.00 | 0.38 | 0.00 | 0.00 | 0.25 | 0.00 | 0.00 | 0.38 | 0.00 | 0.00 | 0.25 | 0.00 | 0.00 | 0.38 | 0.00 | 0.00 | 0.25 |
| R20 | 0.00 | 0.00 | 0.50 | 0.00 | 0.00 | 0.50 | 0.00 | 0.00 | 0.50 | 0.00 | 0.00 | 0.50 | 0.00 | 0.00 | 0.50 | 0.00 | 0.00 | 0.50 |
| R21 | 0.13 | 0.50 | 0.75 | 0.13 | 0.50 | 0.75 | 0.13 | 0.50 | 0.75 | 0.25 | 0.75 | 1.00 | 0.25 | 0.75 | 1.00 | 0.13 | 0.50 | 0.75 |
| R22 | 0.00 | 0.25 | 0.75 | 0.00 | 0.25 | 0.75 | 0.00 | 0.13 | 0.50 | 0.00 | 0.13 | 0.50 | 0.00 | 0.13 | 0.50 | 0.00 | 0.00 | 0.25 |

**Table S5.** Distance to the Positive Ideal Solution for LIs.

| #   | P1    | P2    | P3    | P4    | P5    | P6    | P7    | P8    | P9    | P10   | P11   | P12   | P13   | P14   | P15   | P16   |
|-----|-------|-------|-------|-------|-------|-------|-------|-------|-------|-------|-------|-------|-------|-------|-------|-------|
| R1  | 0.65  | 0.65  | 0.65  | 0.65  | 0.65  | 0.68  | 0.65  | 0.65  | 0.68  | 0.65  | 0.65  | 0.65  | 0.65  | 0.65  | 0.65  | 0.65  |
| R2  | 0.46  | 0.46  | 0.36  | 0.46  | 0.60  | 0.60  | 0.46  | 0.78  | 0.60  | 0.60  | 0.46  | 0.60  | 0.60  | 0.46  | 0.46  | 0.46  |
| R3  | 0.68  | 0.68  | 0.68  | 0.68  | 0.74  | 0.68  | 0.68  | 0.74  | 0.68  | 0.68  | 0.68  | 0.65  | 0.74  | 0.82  | 0.74  | 0.68  |
| R4  | 0.68  | 0.68  | 0.68  | 0.74  | 0.74  | 0.68  | 0.74  | 0.74  | 0.74  | 0.74  | 0.68  | 0.74  | 0.74  | 0.74  | 0.82  | 0.68  |
| R5  | 0.87  | 0.87  | 0.87  | 0.87  | 0.87  | 0.87  | 0.87  | 0.87  | 0.87  | 0.87  | 0.89  | 0.87  | 0.87  | 0.92  | 0.87  | 0.87  |
| R6  | 0.68  | 0.74  | 0.68  | 0.74  | 0.74  | 0.74  | 0.68  | 0.74  | 0.68  | 0.74  | 0.74  | 0.68  | 0.74  | 0.82  | 0.74  | 0.82  |
| R7  | 0.68  | 0.68  | 0.68  | 0.68  | 0.74  | 0.74  | 0.82  | 0.82  | 0.74  | 0.65  | 0.68  | 0.74  | 0.82  | 0.92  | 0.82  | 0.68  |
| R8  | 0.65  | 0.74  | 0.68  | 0.65  | 0.68  | 0.65  | 0.68  | 0.74  | 0.65  | 0.68  | 0.68  | 0.68  | 0.68  | 0.68  | 0.74  | 0.74  |
| R9  | 0.68  | 0.68  | 0.68  | 0.68  | 0.68  | 0.74  | 0.68  | 0.68  | 0.74  | 0.65  | 0.68  | 0.68  | 0.68  | 0.74  | 0.74  | 0.74  |
| R10 | 0.89  | 0.87  | 0.87  | 0.87  | 0.87  | 0.87  | 0.87  | 0.87  | 0.87  | 0.87  | 0.87  | 0.87  | 0.87  | 0.87  | 0.87  | 0.87  |
| R11 | 0.87  | 0.87  | 0.87  | 0.87  | 0.87  | 0.87  | 0.89  | 0.89  | 0.89  | 0.89  | 0.87  | 0.89  | 0.89  | 0.92  | 0.89  | 0.89  |
| R12 | 0.46  | 0.46  | 0.46  | 0.46  | 0.46  | 0.60  | 0.46  | 0.60  | 0.78  | 0.60  | 0.46  | 0.46  | 0.60  | 0.60  | 0.46  | 0.60  |
| R13 | 0.46  | 0.46  | 0.46  | 0.46  | 0.46  | 0.60  | 0.46  | 0.46  | 0.46  | 0.46  | 0.36  | 0.46  | 0.46  | 0.60  | 0.46  | 0.46  |
| R14 | 0.69  | 0.69  | 0.69  | 0.78  | 0.78  | 0.78  | 0.78  | 0.78  | 0.78  | 0.78  | 0.78  | 0.69  | 0.69  | 0.78  | 0.78  | 0.78  |
| R15 | 0.74  | 0.74  | 0.68  | 0.74  | 0.74  | 0.74  | 0.74  | 0.74  | 0.74  | 0.74  | 0.82  | 0.82  | 0.82  | 0.92  | 0.74  | 0.82  |
| R16 | 0.87  | 0.89  | 0.87  | 0.87  | 0.89  | 0.87  | 0.89  | 0.89  | 0.89  | 0.92  | 0.87  | 0.89  | 0.89  | 0.92  | 0.92  | 0.92  |
| R17 | 0.52  | 0.52  | 0.52  | 0.52  | 0.52  | 0.72  | 0.52  | 0.52  | 0.72  | 0.52  | 0.72  | 0.72  | 0.72  | 0.72  | 0.72  | 0.72  |
| R18 | 0.74  | 0.74  | 0.74  | 0.74  | 0.68  | 0.68  | 0.68  | 0.74  | 0.68  | 0.74  | 0.68  | 0.74  | 0.68  | 0.68  | 0.68  | 0.74  |
| R19 | 0.89  | 0.89  | 0.89  | 0.89  | 0.92  | 0.92  | 0.89  | 0.92  | 0.89  | 0.87  | 0.89  | 0.92  | 0.89  | 0.92  | 0.89  | 0.92  |
| R20 | 0.87  | 0.87  | 0.87  | 0.87  | 0.87  | 0.87  | 0.87  | 0.87  | 0.87  | 0.87  | 0.87  | 0.87  | 0.87  | 0.87  | 0.87  | 0.87  |
| R21 | 0.36  | 0.46  | 0.36  | 0.36  | 0.60  | 0.60  | 0.46  | 0.78  | 0.60  | 0.60  | 0.60  | 0.60  | 0.60  | 0.46  | 0.46  | 0.60  |
| R22 | 0.74  | 0.74  | 0.74  | 0.74  | 0.68  | 0.74  | 0.74  | 0.68  | 0.74  | 0.82  | 0.74  | 0.74  | 0.82  | 0.82  | 0.82  | 0.92  |
| Sum | 15.09 | 15.34 | 14.95 | 15.26 | 15.74 | 16.20 | 15.47 | 16.45 | 16.25 | 15.89 | 15.64 | 15.93 | 16.30 | 16.82 | 16.09 | 16.41 |



**Table S6.** Distance to the Negative Ideal Solution for LIs.

| #   | P1    | P2    | P3    | P4    | P5    | P6   | P7    | P8   | P9   | P10   | P11   | P12   | P13  | P14  | P15  | P16  |
|-----|-------|-------|-------|-------|-------|------|-------|------|------|-------|-------|-------|------|------|------|------|
| R1  | 0.65  | 0.65  | 0.65  | 0.65  | 0.65  | 0.62 | 0.65  | 0.65 | 0.62 | 0.65  | 0.65  | 0.65  | 0.65 | 0.65 | 0.65 | 0.65 |
| R2  | 0.74  | 0.74  | 0.84  | 0.74  | 0.53  | 0.53 | 0.74  | 0.32 | 0.53 | 0.53  | 0.74  | 0.53  | 0.53 | 0.74 | 0.74 | 0.74 |
| R3  | 0.62  | 0.62  | 0.62  | 0.62  | 0.46  | 0.62 | 0.62  | 0.46 | 0.62 | 0.62  | 0.62  | 0.65  | 0.46 | 0.30 | 0.46 | 0.62 |
| R4  | 0.62  | 0.62  | 0.62  | 0.46  | 0.46  | 0.62 | 0.46  | 0.46 | 0.46 | 0.46  | 0.62  | 0.46  | 0.46 | 0.46 | 0.30 | 0.62 |
| R5  | 0.29  | 0.29  | 0.29  | 0.29  | 0.29  | 0.29 | 0.29  | 0.29 | 0.29 | 0.29  | 0.22  | 0.29  | 0.29 | 0.14 | 0.29 | 0.29 |
| R6  | 0.62  | 0.46  | 0.62  | 0.46  | 0.46  | 0.46 | 0.62  | 0.46 | 0.62 | 0.46  | 0.46  | 0.62  | 0.46 | 0.30 | 0.46 | 0.30 |
| R7  | 0.62  | 0.62  | 0.62  | 0.62  | 0.46  | 0.46 | 0.30  | 0.30 | 0.46 | 0.65  | 0.62  | 0.46  | 0.30 | 0.14 | 0.30 | 0.62 |
| R8  | 0.65  | 0.46  | 0.62  | 0.65  | 0.62  | 0.65 | 0.62  | 0.46 | 0.65 | 0.62  | 0.62  | 0.62  | 0.62 | 0.62 | 0.46 | 0.46 |
| R9  | 0.62  | 0.62  | 0.62  | 0.62  | 0.62  | 0.46 | 0.62  | 0.62 | 0.46 | 0.65  | 0.62  | 0.62  | 0.62 | 0.46 | 0.46 | 0.46 |
| R10 | 0.22  | 0.29  | 0.29  | 0.29  | 0.29  | 0.29 | 0.29  | 0.29 | 0.29 | 0.29  | 0.29  | 0.29  | 0.29 | 0.29 | 0.29 | 0.29 |
| R11 | 0.29  | 0.29  | 0.29  | 0.29  | 0.29  | 0.29 | 0.22  | 0.22 | 0.22 | 0.22  | 0.29  | 0.22  | 0.22 | 0.14 | 0.22 | 0.22 |
| R12 | 0.74  | 0.74  | 0.74  | 0.74  | 0.74  | 0.53 | 0.74  | 0.53 | 0.32 | 0.53  | 0.74  | 0.74  | 0.53 | 0.53 | 0.74 | 0.53 |
| R13 | 0.74  | 0.74  | 0.74  | 0.74  | 0.74  | 0.53 | 0.74  | 0.74 | 0.74 | 0.74  | 0.84  | 0.74  | 0.74 | 0.53 | 0.74 | 0.74 |
| R14 | 0.61  | 0.61  | 0.61  | 0.40  | 0.40  | 0.40 | 0.40  | 0.40 | 0.40 | 0.40  | 0.40  | 0.61  | 0.61 | 0.40 | 0.40 | 0.40 |
| R15 | 0.46  | 0.46  | 0.62  | 0.46  | 0.46  | 0.46 | 0.46  | 0.46 | 0.46 | 0.46  | 0.30  | 0.30  | 0.30 | 0.14 | 0.46 | 0.30 |
| R16 | 0.29  | 0.22  | 0.29  | 0.29  | 0.22  | 0.29 | 0.22  | 0.22 | 0.22 | 0.14  | 0.29  | 0.22  | 0.22 | 0.14 | 0.14 | 0.14 |
| R17 | 0.70  | 0.70  | 0.70  | 0.70  | 0.70  | 0.43 | 0.70  | 0.70 | 0.43 | 0.70  | 0.43  | 0.43  | 0.43 | 0.43 | 0.43 | 0.43 |
| R18 | 0.46  | 0.46  | 0.46  | 0.46  | 0.62  | 0.62 | 0.62  | 0.46 | 0.62 | 0.46  | 0.62  | 0.46  | 0.62 | 0.62 | 0.62 | 0.46 |
| R19 | 0.22  | 0.22  | 0.22  | 0.22  | 0.14  | 0.14 | 0.22  | 0.14 | 0.22 | 0.29  | 0.22  | 0.14  | 0.22 | 0.14 | 0.22 | 0.14 |
| R20 | 0.29  | 0.29  | 0.29  | 0.29  | 0.29  | 0.29 | 0.29  | 0.29 | 0.29 | 0.29  | 0.29  | 0.29  | 0.29 | 0.29 | 0.29 | 0.29 |
| R21 | 0.84  | 0.74  | 0.84  | 0.84  | 0.53  | 0.53 | 0.74  | 0.32 | 0.53 | 0.53  | 0.53  | 0.53  | 0.53 | 0.74 | 0.74 | 0.53 |
| R22 | 0.46  | 0.46  | 0.46  | 0.46  | 0.62  | 0.46 | 0.46  | 0.62 | 0.46 | 0.30  | 0.46  | 0.46  | 0.30 | 0.30 | 0.30 | 0.14 |
| Sum | 11.69 | 11.23 | 12.01 | 11.23 | 10.53 | 9.91 | 10.95 | 9.36 | 9.85 | 10.22 | 10.81 | 10.27 | 9.62 | 8.48 | 9.65 | 9.33 |

**Table S7.** Total positive and negative distances and  $CC_i$  for LIs.

| #   | d+    | d-    | $CC_i$ |
|-----|-------|-------|--------|
| P1  | 15.09 | 11.69 | 0.437  |
| P2  | 15.34 | 11.23 | 0.423  |
| P3  | 14.95 | 12.01 | 0.445  |
| P4  | 15.26 | 11.23 | 0.424  |
| P5  | 15.74 | 10.53 | 0.401  |
| P6  | 16.2  | 9.91  | 0.38   |
| P7  | 15.47 | 10.95 | 0.414  |
| P8  | 16.45 | 9.362 | 0.363  |
| P9  | 16.25 | 9.846 | 0.377  |
| P10 | 15.89 | 10.22 | 0.391  |
| P11 | 15.64 | 10.81 | 0.409  |
| P12 | 15.93 | 10.27 | 0.392  |
| P13 | 16.3  | 9.624 | 0.371  |
| P14 | 16.82 | 8.477 | 0.335  |
| P15 | 16.09 | 9.651 | 0.375  |
| P16 | 16.41 | 9.325 | 0.362  |

**Table S8.** Matrix  $\tilde{G}$  containing the scores assigned by respondents in the fuzzy triangular form for SMIs.

| #          | P1   |      |      | P2   |      |      | P3   |      |      | P4   |      |      | P5   |      |      | P6   |      |      | P7   |      |      | P8   |      |      | P9   |      |      | P10  |      |      |
|------------|------|------|------|------|------|------|------|------|------|------|------|------|------|------|------|------|------|------|------|------|------|------|------|------|------|------|------|------|------|------|
| <b>R1</b>  | 0    | 0.25 | 0.5  | 0    | 0.25 | 0.5  | 0    | 0.25 | 0.5  | 0    | 0.25 | 0.5  | 0    | 0.25 | 0.5  | 0    | 0.25 | 0.5  | 0    | 0.25 | 0.5  | 0    | 0    | 0.25 | 0    | 0    | 0.25 | 0    | 0    | 0.25 |
| <b>R2</b>  | 0    | 0.25 | 0.5  | 0    | 0.25 | 0.5  | 0.25 | 0.5  | 0.75 | 0    | 0.25 | 0.5  | 0    | 0.25 | 0.5  | 0    | 0.25 | 0.5  | 0    | 0.25 | 0.5  | 0    | 0.25 | 0.5  | 0    | 0.25 | 0.5  | 0    | 0.25 | 0.5  |
| <b>R3</b>  | 0    | 0.25 | 0.5  | 0.5  | 0.75 | 1    | 0.5  | 0.75 | 1    | 0.5  | 0.75 | 1    | 0.5  | 0.75 | 1    | 0.25 | 0.5  | 0.75 | 0    | 0.25 | 0.5  | 0    | 0.25 | 0.5  | 0.25 | 0.5  | 0.75 | 0    | 0.25 | 0.5  |
| <b>R4</b>  | 0.25 | 0.5  | 0.75 | 0.25 | 0.5  | 0.75 | 0.5  | 0.75 | 1    | 0.25 | 0.5  | 0.75 | 0    | 0.25 | 0.5  | 0.25 | 0.5  | 0.75 | 0    | 0.25 | 0.5  | 0    | 0.25 | 0.5  | 0    | 0.25 | 0.5  | 0    | 0.25 | 0.5  |
| <b>R5</b>  | 0    | 0.25 | 0.5  | 0.25 | 0.5  | 0.75 | 0.25 | 0.5  | 0.75 | 0.25 | 0.5  | 0.75 | 0    | 0.25 | 0.5  | 0    | 0.25 | 0.5  | 0.25 | 0.5  | 0.75 | 0.25 | 0.5  | 0.75 | 0    | 0.25 | 0.5  | 0    | 0.25 | 0.5  |
| <b>R6</b>  | 0.25 | 0.5  | 0.75 | 0    | 0.25 | 0.5  | 0.25 | 0.5  | 0.75 | 0    | 0    | 0.25 | 0    | 0.25 | 0.5  | 0    | 0    | 0.25 | 0    | 0.25 | 0.5  | 0    | 0    | 0.25 | 0    | 0    | 0.25 | 0    | 0    | 0.25 |
| <b>R7</b>  | 0    | 0    | 0.25 | 0    | 0    | 0.25 | 0    | 0    | 0.25 | 0    | 0    | 0.25 | 0    | 0    | 0.25 | 0    | 0    | 0.25 | 0    | 0    | 0.25 | 0    | 0    | 0.25 | 0    | 0    | 0.25 | 0    | 0    | 0.25 |
| <b>R8</b>  | 0.25 | 0.5  | 0.75 | 0    | 0.25 | 0.5  | 0.25 | 0.5  | 0.75 | 0.25 | 0.5  | 0.75 | 0.25 | 0.5  | 0.75 | 0.25 | 0.5  | 0.75 | 0.25 | 0.5  | 0.75 | 0    | 0.25 | 0.5  | 0.25 | 0.5  | 0.75 | 0.25 | 0.5  | 0.75 |
| <b>R9</b>  | 0    | 0.25 | 0.5  | 0    | 0.25 | 0.5  | 0    | 0.25 | 0.5  | 0    | 0.25 | 0.5  | 0    | 0.25 | 0.5  | 0    | 0    | 0.25 | 0    | 0.25 | 0.5  | 0    | 0.25 | 0.5  | 0    | 0    | 0.25 | 0    | 0.25 | 0.5  |
| <b>R10</b> | 0    | 0.25 | 0.5  | 0    | 0.25 | 0.5  | 0    | 0.25 | 0.5  | 0    | 0.25 | 0.5  | 0    | 0.25 | 0.5  | 0    | 0.25 | 0.5  | 0    | 0.25 | 0.5  | 0    | 0.25 | 0.5  | 0    | 0.25 | 0.5  | 0    | 0.25 | 0.5  |
| <b>R11</b> | 0.25 | 0.5  | 0.75 | 0.25 | 0.5  | 0.75 | 0.25 | 0.5  | 0.75 | 0.25 | 0.5  | 0.75 | 0.25 | 0.5  | 0.75 | 0.5  | 0.75 | 1    | 0    | 0.25 | 0.5  | 0    | 0.25 | 0.5  | 0.25 | 0.5  | 0.75 | 0.25 | 0.5  | 0.75 |
| <b>R12</b> | 0.25 | 0.5  | 0.75 | 0.25 | 0.5  | 0.75 | 0    | 0.25 | 0.5  | 0    | 0.25 | 0.5  | 0    | 0.25 | 0.5  | 0.25 | 0.5  | 0.75 | 0    | 0.25 | 0.5  | 0    | 0    | 0.25 | 0    | 0    | 0.25 | 0    | 0    | 0.25 |
| <b>R13</b> | 0    | 0.25 | 0.5  | 0    | 0.25 | 0.5  | 0    | 0    | 0.25 | 0    | 0.25 | 0.5  | 0    | 0    | 0.25 | 0    | 0    | 0.25 | 0    | 0.25 | 0.5  | 0    | 0    | 0.25 | 0    | 0    | 0.25 | 0    | 0    | 0.25 |
| <b>R14</b> | 0    | 0.25 | 0.5  | 0    | 0.25 | 0.5  | 0    | 0.25 | 0.5  | 0    | 0    | 0.25 | 0    | 0    | 0.25 | 0.25 | 0.5  | 0.75 | 0    | 0.25 | 0.5  | 0    | 0    | 0.25 | 0    | 0    | 0.25 | 0    | 0    | 0.25 |
| <b>R15</b> | 0    | 0.25 | 0.5  | 0    | 0.25 | 0.5  | 0    | 0.25 | 0.5  | 0    | 0    | 0.25 | 0    | 0.25 | 0.5  | 0    | 0    | 0.25 | 0    | 0    | 0.25 | 0    | 0.25 | 0.5  | 0    | 0    | 0.25 | 0    | 0    | 0.25 |
| <b>R16</b> | 0.25 | 0.5  | 0.75 | 0    | 0.25 | 0.5  | 0.25 | 0.5  | 0.75 | 0    | 0.25 | 0.5  | 0    | 0.25 | 0.5  | 0    | 0.25 | 0.5  | 0    | 0.25 | 0.5  | 0    | 0    | 0.25 | 0    | 0    | 0.25 | 0    | 0    | 0.25 |
| <b>R17</b> | 0    | 0.25 | 0.5  | 0    | 0.25 | 0.5  | 0    | 0.25 | 0.5  | 0    | 0.25 | 0.5  | 0    | 0.25 | 0.5  | 0    | 0.25 | 0.5  | 0    | 0.25 | 0.5  | 0    | 0.25 | 0.5  | 0    | 0.25 | 0.5  | 0    | 0.25 | 0.5  |
| <b>R18</b> | 0    | 0.25 | 0.5  | 0    | 0.25 | 0.5  | 0    | 0.25 | 0.5  | 0    | 0.25 | 0.5  | 0    | 0.25 | 0.5  | 0    | 0.25 | 0.5  | 0    | 0.25 | 0.5  | 0    | 0.25 | 0.5  | 0    | 0.25 | 0.5  | 0.25 | 0.5  | 0.75 |
| <b>R19</b> | 0    | 0.25 | 0.5  | 0    | 0.25 | 0.5  | 0    | 0.25 | 0.5  | 0    | 0.25 | 0.5  | 0    | 0    | 0.25 | 0    | 0    | 0.25 | 0.25 | 0.5  | 0.75 | 0    | 0    | 0.25 | 0.25 | 0.5  | 0.75 | 0.25 | 0.5  | 0.75 |
| <b>R20</b> | 0    | 0.25 | 0.5  | 0    | 0.25 | 0.5  | 0.5  | 0.75 | 1    | 0    | 0.25 | 0.5  | 0    | 0.25 | 0.5  | 0    | 0.25 | 0.5  | 0    | 0.25 | 0.5  | 0    | 0.25 | 0.5  | 0    | 0.25 | 0.5  | 0    | 0.25 | 0.5  |
| <b>R21</b> | 0.25 | 0.5  | 0.75 | 0.25 | 0.5  | 0.75 | 0.25 | 0.5  | 0.75 | 0.25 | 0.5  | 0.75 | 0.25 | 0.5  | 0.75 | 0.25 | 0.5  | 0.75 | 0.25 | 0.5  | 0.75 | 0    | 0.25 | 0.5  | 0    | 0.25 | 0.5  | 0.25 | 0.5  | 0.75 |
| <b>R22</b> | 0    | 0.25 | 0.5  | 0    | 0.25 | 0.5  | 0    | 0.25 | 0.5  | 0    | 0.25 | 0.5  | 0.5  | 0.75 | 1    | 0    | 0.25 | 0.5  | 0    | 0.25 | 0.5  | 0.25 | 0.5  | 0.75 | 0    | 0.25 | 0.5  | 0    | 0    | 0.25 |

(Table S8 - Continues)

(Table S8 - Ends)

| #   | P10  |      |      | P11  |      |      | P12  |      |      | P13  |      |      | P14  |      |      | P15  |      |      | P16  |      |      |
|-----|------|------|------|------|------|------|------|------|------|------|------|------|------|------|------|------|------|------|------|------|------|
| R1  | 0    | 0    | 0.25 | 0    | 0.25 | 0.5  | 0    | 0.25 | 0.5  | 0.25 | 0.5  | 0.75 | 0    | 0.25 | 0.5  | 0    | 0    | 0.25 | 0.75 | 1    | 1    |
| R2  | 0    | 0.25 | 0.5  | 0    | 0.25 | 0.5  | 0    | 0.25 | 0.5  | 0    | 0.25 | 0.5  | 0    | 0.25 | 0.5  | 0    | 0    | 0.25 | 0.5  | 0.75 | 1    |
| R3  | 0.5  | 0.75 | 1    | 0.5  | 0.75 | 1    | 0.25 | 0.5  | 0.75 | 0    | 0    | 0.25 | 0    | 0.25 | 0.5  | 0    | 0.25 | 0.5  | 0.5  | 0.75 | 1    |
| R4  | 0.25 | 0.5  | 0.75 | 0.25 | 0.5  | 0.75 | 0.25 | 0.5  | 0.75 | 0    | 0.25 | 0.5  | 0    | 0.25 | 0.5  | 0    | 0.25 | 0.5  | 0.5  | 0.75 | 1    |
| R5  | 0.25 | 0.5  | 0.75 | 0    | 0.25 | 0.5  | 0    | 0.25 | 0.5  | 0    | 0.25 | 0.5  | 0.25 | 0.5  | 0.75 | 0.25 | 0.5  | 0.75 | 0.75 | 1    | 1    |
| R6  | 0    | 0    | 0.25 | 0    | 0.25 | 0.5  | 0    | 0    | 0.25 | 0    | 0    | 0.25 | 0    | 0    | 0.25 | 0    | 0    | 0.25 | 0    | 0.25 | 0.5  |
| R7  | 0    | 0    | 0.25 | 0    | 0    | 0.25 | 0    | 0    | 0.25 | 0    | 0    | 0.25 | 0    | 0    | 0.25 | 0    | 0    | 0.25 | 0.5  | 0.75 | 1    |
| R8  | 0.25 | 0.5  | 0.75 | 0.25 | 0.5  | 0.75 | 0.25 | 0.5  | 0.75 | 0    | 0.25 | 0.5  | 0    | 0.25 | 0.5  | 0    | 0.25 | 0.5  | 0.25 | 0.5  | 0.75 |
| R9  | 0    | 0.25 | 0.5  | 0    | 0.25 | 0.5  | 0    | 0.25 | 0.5  | 0    | 0    | 0.25 | 0    | 0    | 0.25 | 0    | 0    | 0.25 | 0.25 | 0.5  | 0.75 |
| R10 | 0    | 0.25 | 0.5  | 0    | 0.25 | 0.5  | 0    | 0.25 | 0.5  | 0    | 0.25 | 0.5  | 0    | 0.25 | 0.5  | 0    | 0    | 0.25 | 0.5  | 0.75 | 1    |
| R11 | 0.25 | 0.5  | 0.75 | 0.25 | 0.5  | 0.75 | 0.25 | 0.5  | 0.75 | 0    | 0.25 | 0.5  | 0.25 | 0.5  | 0.75 | 0.25 | 0.5  | 0.75 | 0.25 | 0.5  | 0.75 |
| R12 | 0    | 0.25 | 0.5  | 0    | 0.25 | 0.5  | 0    | 0.25 | 0.5  | 0    | 0.25 | 0.5  | 0    | 0.25 | 0.5  | 0    | 0    | 0.25 | 0.25 | 0.5  | 0.75 |
| R13 | 0    | 0.25 | 0.5  | 0    | 0    | 0.25 | 0    | 0    | 0.25 | 0    | 0    | 0.25 | 0    | 0    | 0.25 | 0    | 0    | 0.25 | 0.5  | 0.75 | 1    |
| R14 | 0    | 0    | 0.25 | 0    | 0.25 | 0.5  | 0    | 0.25 | 0.5  | 0    | 0    | 0.25 | 0    | 0    | 0.25 | 0    | 0    | 0.25 | 0    | 0.25 | 0.5  |
| R15 | 0    | 0    | 0.25 | 0    | 0    | 0.25 | 0    | 0    | 0.25 | 0    | 0    | 0.25 | 0    | 0.25 | 0.5  | 0    | 0    | 0.25 | 0    | 0.25 | 0.5  |
| R16 | 0    | 0.25 | 0.5  | 0    | 0    | 0.25 | 0    | 0    | 0.25 | 0    | 0    | 0.25 | 0    | 0    | 0.25 | 0    | 0    | 0.25 | 0    | 0.25 | 0.5  |
| R17 | 0    | 0.25 | 0.5  | 0    | 0.25 | 0.5  | 0    | 0.25 | 0.5  | 0    | 0.25 | 0.5  | 0    | 0.25 | 0.5  | 0    | 0.25 | 0.5  | 0    | 0.25 | 0.5  |
| R18 | 0.25 | 0.5  | 0.75 | 0.25 | 0.5  | 0.75 | 0.25 | 0.5  | 0.75 | 0.25 | 0.5  | 0.75 | 0.25 | 0.5  | 0.75 | 0.25 | 0.5  | 0.75 | 0.25 | 0.5  | 0.75 |
| R19 | 0.25 | 0.5  | 0.75 | 0    | 0.25 | 0.5  | 0    | 0.25 | 0.5  | 0    | 0.25 | 0.5  | 0    | 0.25 | 0.5  | 0    | 0    | 0.25 | 0    | 0.25 | 0.5  |
| R20 | 0.25 | 0.5  | 0.75 | 0    | 0.25 | 0.5  | 0    | 0.25 | 0.5  | 0    | 0    | 0.25 | 0    | 0    | 0.25 | 0    | 0.25 | 0.5  | 0.75 | 1    | 1    |
| R21 | 0    | 0.25 | 0.5  | 0.25 | 0.5  | 0.75 | 0.25 | 0.5  | 0.75 | 0.25 | 0.5  | 0.75 | 0.25 | 0.5  | 0.75 | 0    | 0.25 | 0.5  | 0.25 | 0.5  | 0.75 |
| R22 | 0    | 0.25 | 0.5  | 0    | 0.25 | 0.5  | 0    | 0    | 0.25 | 0    | 0    | 0.25 | 0    | 0.25 | 0.5  | 0    | 0    | 0.25 | 0    | 0    | 0.25 |

**Table S9.** Vector  $\tilde{E}$  representing the fuzzy weights of the respondents for SMIs.

| #   | Classification |      |      | Group |
|-----|----------------|------|------|-------|
| R1  | 0.00           | 0.50 | 1.00 | N2    |
| R2  | 0.50           | 1.00 | 1.00 | N3    |
| R3  | 0.00           | 0.50 | 1.00 | N2    |
| R4  | 0.00           | 0.50 | 1.00 | N2    |
| R5  | 0.00           | 0.00 | 0.50 | N1    |
| R6  | 0.00           | 0.50 | 1.00 | N2    |
| R7  | 0.00           | 0.50 | 1.00 | N2    |
| R8  | 0.00           | 0.50 | 1.00 | N2    |
| R9  | 0.00           | 0.50 | 1.00 | N2    |
| R10 | 0.00           | 0.00 | 0.50 | N1    |
| R11 | 0.00           | 0.00 | 0.50 | N1    |
| R12 | 0.50           | 1.00 | 1.00 | N3    |
| R13 | 0.50           | 1.00 | 1.00 | N3    |
| R14 | 0.00           | 0.50 | 1.00 | N2    |
| R15 | 0.00           | 0.50 | 1.00 | N2    |
| R16 | 0.00           | 0.00 | 0.50 | N1    |
| R17 | 0.50           | 1.00 | 1.00 | N3    |
| R18 | 0.00           | 0.50 | 1.00 | N2    |
| R19 | 0.00           | 0.00 | 0.50 | N1    |
| R20 | 0.00           | 0.00 | 0.50 | N1    |
| R21 | 0.50           | 1.00 | 1.00 | N3    |
| R22 | 0.00           | 0.50 | 1.00 | N2    |

**Table S10.** Matrix  $\mathcal{R}$  containing the scores assigned by respondents in the fuzzy triangular form normalized based on the highest score value for SMIs.

| #   | P1   |      |      | P2   |      |      | P3   |      |      | P4   |      |      | P5   |      |      | P6   |      |      | P7   |      |      | P8   |      |      | P9   |      |      | P10  |      |      |
|-----|------|------|------|------|------|------|------|------|------|------|------|------|------|------|------|------|------|------|------|------|------|------|------|------|------|------|------|------|------|------|
| R1  | 0.00 | 0.33 | 0.67 | 0.00 | 0.33 | 0.67 | 0.00 | 0.33 | 0.67 | 0.00 | 0.33 | 0.67 | 0.00 | 0.33 | 0.67 | 0.00 | 0.33 | 0.67 | 0.00 | 0.33 | 0.67 | 0.00 | 0.00 | 0.33 | 0.00 | 0.00 | 0.33 | 0.00 | 0.00 | 0.33 |
| R2  | 0.00 | 0.33 | 0.67 | 0.00 | 0.33 | 0.67 | 0.33 | 0.67 | 1.00 | 0.00 | 0.33 | 0.67 | 0.00 | 0.33 | 0.67 | 0.00 | 0.33 | 0.67 | 0.00 | 0.33 | 0.67 | 0.00 | 0.33 | 0.67 | 0.00 | 0.33 | 0.67 | 0.00 | 0.33 | 0.67 |
| R3  | 0.00 | 0.25 | 0.50 | 0.50 | 0.75 | 1.00 | 0.50 | 0.75 | 1.00 | 0.50 | 0.75 | 1.00 | 0.50 | 0.75 | 1.00 | 0.25 | 0.50 | 0.75 | 0.00 | 0.25 | 0.50 | 0.00 | 0.25 | 0.50 | 0.25 | 0.50 | 0.75 | 0.00 | 0.25 | 0.50 |
| R4  | 0.25 | 0.50 | 0.75 | 0.25 | 0.50 | 0.75 | 0.50 | 0.75 | 1.00 | 0.25 | 0.50 | 0.75 | 0.00 | 0.25 | 0.50 | 0.25 | 0.50 | 0.75 | 0.00 | 0.25 | 0.50 | 0.00 | 0.25 | 0.50 | 0.00 | 0.25 | 0.50 | 0.00 | 0.25 | 0.50 |
| R5  | 0.00 | 0.33 | 0.67 | 0.33 | 0.67 | 1.00 | 0.33 | 0.67 | 1.00 | 0.33 | 0.67 | 1.00 | 0.00 | 0.33 | 0.67 | 0.00 | 0.33 | 0.67 | 0.33 | 0.67 | 1.00 | 0.33 | 0.67 | 1.00 | 0.00 | 0.33 | 0.67 | 0.00 | 0.33 | 0.67 |
| R6  | 0.33 | 0.67 | 1.00 | 0.00 | 0.33 | 0.67 | 0.33 | 0.67 | 1.00 | 0.00 | 0.00 | 0.33 | 0.00 | 0.33 | 0.67 | 0.00 | 0.00 | 0.33 | 0.00 | 0.33 | 0.67 | 0.00 | 0.00 | 0.33 | 0.00 | 0.00 | 0.33 | 0.00 | 0.00 | 0.33 |
| R7  | 0.00 | 0.00 | 1.00 | 0.00 | 0.00 | 1.00 | 0.00 | 0.00 | 1.00 | 0.00 | 0.00 | 1.00 | 0.00 | 0.00 | 1.00 | 0.00 | 0.00 | 1.00 | 0.00 | 0.00 | 1.00 | 0.00 | 0.00 | 1.00 | 0.00 | 0.00 | 1.00 | 0.00 | 0.00 | 1.00 |
| R8  | 0.33 | 0.67 | 1.00 | 0.00 | 0.33 | 0.67 | 0.33 | 0.67 | 1.00 | 0.33 | 0.67 | 1.00 | 0.33 | 0.67 | 1.00 | 0.33 | 0.67 | 1.00 | 0.33 | 0.67 | 1.00 | 0.00 | 0.33 | 0.67 | 0.33 | 0.67 | 1.00 | 0.33 | 0.67 | 1.00 |
| R9  | 0.00 | 0.50 | 1.00 | 0.00 | 0.50 | 1.00 | 0.00 | 0.50 | 1.00 | 0.00 | 0.50 | 1.00 | 0.00 | 0.50 | 1.00 | 0.00 | 0.00 | 0.50 | 0.00 | 0.50 | 1.00 | 0.00 | 0.50 | 1.00 | 0.00 | 0.00 | 0.50 | 0.00 | 0.50 | 1.00 |
| R10 | 0.00 | 0.50 | 1.00 | 0.00 | 0.50 | 1.00 | 0.00 | 0.50 | 1.00 | 0.00 | 0.50 | 1.00 | 0.00 | 0.50 | 1.00 | 0.00 | 0.50 | 1.00 | 0.00 | 0.50 | 1.00 | 0.00 | 0.50 | 1.00 | 0.00 | 0.50 | 1.00 | 0.00 | 0.50 | 1.00 |
| R11 | 0.25 | 0.50 | 0.75 | 0.25 | 0.50 | 0.75 | 0.25 | 0.50 | 0.75 | 0.25 | 0.50 | 0.75 | 0.25 | 0.50 | 0.75 | 0.50 | 0.75 | 1.00 | 0.00 | 0.25 | 0.50 | 0.00 | 0.25 | 0.50 | 0.25 | 0.50 | 0.75 | 0.25 | 0.50 | 0.75 |
| R12 | 0.33 | 0.67 | 1.00 | 0.33 | 0.67 | 1.00 | 0.00 | 0.33 | 0.67 | 0.00 | 0.33 | 0.67 | 0.00 | 0.33 | 0.67 | 0.33 | 0.67 | 1.00 | 0.00 | 0.33 | 0.67 | 0.00 | 0.00 | 0.33 | 0.00 | 0.00 | 0.33 | 0.00 | 0.00 | 0.33 |
| R13 | 0.00 | 0.50 | 1.00 | 0.00 | 0.50 | 1.00 | 0.00 | 0.00 | 0.50 | 0.00 | 0.50 | 1.00 | 0.00 | 0.00 | 0.50 | 0.00 | 0.00 | 0.50 | 0.00 | 0.50 | 1.00 | 0.00 | 0.00 | 0.50 | 0.00 | 0.00 | 0.50 | 0.00 | 0.00 | 0.50 |
| R14 | 0.00 | 0.33 | 0.67 | 0.00 | 0.33 | 0.67 | 0.00 | 0.33 | 0.67 | 0.00 | 0.00 | 0.33 | 0.00 | 0.00 | 0.33 | 0.33 | 0.67 | 1.00 | 0.00 | 0.33 | 0.67 | 0.00 | 0.00 | 0.33 | 0.00 | 0.00 | 0.33 | 0.00 | 0.00 | 0.33 |
| R15 | 0.00 | 0.50 | 1.00 | 0.00 | 0.50 | 1.00 | 0.00 | 0.50 | 1.00 | 0.00 | 0.00 | 0.50 | 0.00 | 0.50 | 1.00 | 0.00 | 0.00 | 0.50 | 0.00 | 0.00 | 0.50 | 0.00 | 0.50 | 1.00 | 0.00 | 0.00 | 0.50 | 0.00 | 0.00 | 0.50 |
| R16 | 0.33 | 0.67 | 1.00 | 0.00 | 0.33 | 0.67 | 0.33 | 0.67 | 1.00 | 0.00 | 0.33 | 0.67 | 0.00 | 0.33 | 0.67 | 0.00 | 0.33 | 0.67 | 0.00 | 0.33 | 0.67 | 0.00 | 0.00 | 0.33 | 0.00 | 0.00 | 0.33 | 0.00 | 0.00 | 0.33 |
| R17 | 0.00 | 0.50 | 1.00 | 0.00 | 0.50 | 1.00 | 0.00 | 0.50 | 1.00 | 0.00 | 0.50 | 1.00 | 0.00 | 0.50 | 1.00 | 0.00 | 0.50 | 1.00 | 0.00 | 0.50 | 1.00 | 0.00 | 0.50 | 1.00 | 0.00 | 0.50 | 1.00 | 0.00 | 0.50 | 1.00 |
| R18 | 0.00 | 0.33 | 0.67 | 0.00 | 0.33 | 0.67 | 0.00 | 0.33 | 0.67 | 0.00 | 0.33 | 0.67 | 0.00 | 0.33 | 0.67 | 0.00 | 0.33 | 0.67 | 0.00 | 0.33 | 0.67 | 0.00 | 0.33 | 0.67 | 0.00 | 0.33 | 0.67 | 0.33 | 0.67 | 1.00 |
| R19 | 0.00 | 0.33 | 0.67 | 0.00 | 0.33 | 0.67 | 0.00 | 0.33 | 0.67 | 0.00 | 0.33 | 0.67 | 0.00 | 0.00 | 0.33 | 0.00 | 0.00 | 0.33 | 0.33 | 0.67 | 1.00 | 0.00 | 0.00 | 0.33 | 0.33 | 0.67 | 1.00 | 0.33 | 0.67 | 1.00 |
| R20 | 0.00 | 0.25 | 0.50 | 0.00 | 0.25 | 0.50 | 0.50 | 0.75 | 1.00 | 0.00 | 0.25 | 0.50 | 0.00 | 0.25 | 0.50 | 0.00 | 0.25 | 0.50 | 0.00 | 0.25 | 0.50 | 0.00 | 0.25 | 0.50 | 0.00 | 0.25 | 0.50 | 0.00 | 0.25 | 0.50 |
| R21 | 0.33 | 0.67 | 1.00 | 0.33 | 0.67 | 1.00 | 0.33 | 0.67 | 1.00 | 0.33 | 0.67 | 1.00 | 0.33 | 0.67 | 1.00 | 0.33 | 0.67 | 1.00 | 0.33 | 0.67 | 1.00 | 0.00 | 0.33 | 0.67 | 0.00 | 0.33 | 0.67 | 0.33 | 0.67 | 1.00 |
| R22 | 0.00 | 0.25 | 0.50 | 0.00 | 0.25 | 0.50 | 0.00 | 0.25 | 0.50 | 0.00 | 0.25 | 0.50 | 0.50 | 0.75 | 1.00 | 0.00 | 0.25 | 0.50 | 0.00 | 0.25 | 0.50 | 0.25 | 0.50 | 0.75 | 0.00 | 0.25 | 0.50 | 0.00 | 0.00 | 0.25 |

(Table S10 - Continues)

(Table S10 - Ends)

| #   | P11  |      |      | P12  |      |      | P13  |      |      | P14  |      |      | P15  |      |      | P16  |      |      |
|-----|------|------|------|------|------|------|------|------|------|------|------|------|------|------|------|------|------|------|
| R1  | 0.00 | 0.00 | 0.33 | 0.00 | 0.33 | 0.67 | 0.00 | 0.33 | 0.67 | 0.33 | 0.67 | 1.00 | 0.00 | 0.33 | 0.67 | 0.00 | 0.00 | 0.33 |
| R2  | 0.00 | 0.33 | 0.67 | 0.00 | 0.33 | 0.67 | 0.00 | 0.33 | 0.67 | 0.00 | 0.33 | 0.67 | 0.00 | 0.33 | 0.67 | 0.00 | 0.00 | 0.33 |
| R3  | 0.50 | 0.75 | 1.00 | 0.50 | 0.75 | 1.00 | 0.25 | 0.50 | 0.75 | 0.00 | 0.00 | 0.25 | 0.00 | 0.25 | 0.50 | 0.00 | 0.25 | 0.50 |
| R4  | 0.25 | 0.50 | 0.75 | 0.25 | 0.50 | 0.75 | 0.25 | 0.50 | 0.75 | 0.00 | 0.25 | 0.50 | 0.00 | 0.25 | 0.50 | 0.00 | 0.25 | 0.50 |
| R5  | 0.33 | 0.67 | 1.00 | 0.00 | 0.33 | 0.67 | 0.00 | 0.33 | 0.67 | 0.00 | 0.33 | 0.67 | 0.33 | 0.67 | 1.00 | 0.33 | 0.67 | 1.00 |
| R6  | 0.00 | 0.00 | 0.33 | 0.00 | 0.33 | 0.67 | 0.00 | 0.00 | 0.33 | 0.00 | 0.00 | 0.33 | 0.00 | 0.00 | 0.33 | 0.00 | 0.00 | 0.33 |
| R7  | 0.00 | 0.00 | 1.00 | 0.00 | 0.00 | 1.00 | 0.00 | 0.00 | 1.00 | 0.00 | 0.00 | 1.00 | 0.00 | 0.00 | 1.00 | 0.00 | 0.00 | 1.00 |
| R8  | 0.33 | 0.67 | 1.00 | 0.33 | 0.67 | 1.00 | 0.33 | 0.67 | 1.00 | 0.00 | 0.33 | 0.67 | 0.00 | 0.33 | 0.67 | 0.00 | 0.33 | 0.67 |
| R9  | 0.00 | 0.50 | 1.00 | 0.00 | 0.50 | 1.00 | 0.00 | 0.50 | 1.00 | 0.00 | 0.00 | 0.50 | 0.00 | 0.00 | 0.50 | 0.00 | 0.00 | 0.50 |
| R10 | 0.00 | 0.50 | 1.00 | 0.00 | 0.50 | 1.00 | 0.00 | 0.50 | 1.00 | 0.00 | 0.50 | 1.00 | 0.00 | 0.50 | 1.00 | 0.00 | 0.00 | 0.50 |
| R11 | 0.25 | 0.50 | 0.75 | 0.25 | 0.50 | 0.75 | 0.25 | 0.50 | 0.75 | 0.00 | 0.25 | 0.50 | 0.25 | 0.50 | 0.75 | 0.25 | 0.50 | 0.75 |
| R12 | 0.00 | 0.33 | 0.67 | 0.00 | 0.33 | 0.67 | 0.00 | 0.33 | 0.67 | 0.00 | 0.33 | 0.67 | 0.00 | 0.33 | 0.67 | 0.00 | 0.00 | 0.33 |
| R13 | 0.00 | 0.50 | 1.00 | 0.00 | 0.00 | 0.50 | 0.00 | 0.00 | 0.50 | 0.00 | 0.00 | 0.50 | 0.00 | 0.00 | 0.50 | 0.00 | 0.00 | 0.50 |
| R14 | 0.00 | 0.00 | 0.33 | 0.00 | 0.33 | 0.67 | 0.00 | 0.33 | 0.67 | 0.00 | 0.00 | 0.33 | 0.00 | 0.00 | 0.33 | 0.00 | 0.00 | 0.33 |
| R15 | 0.00 | 0.00 | 0.50 | 0.00 | 0.00 | 0.50 | 0.00 | 0.00 | 0.50 | 0.00 | 0.00 | 0.50 | 0.00 | 0.50 | 1.00 | 0.00 | 0.00 | 0.50 |
| R16 | 0.00 | 0.33 | 0.67 | 0.00 | 0.00 | 0.33 | 0.00 | 0.00 | 0.33 | 0.00 | 0.00 | 0.33 | 0.00 | 0.00 | 0.33 | 0.00 | 0.00 | 0.33 |
| R17 | 0.00 | 0.50 | 1.00 | 0.00 | 0.50 | 1.00 | 0.00 | 0.50 | 1.00 | 0.00 | 0.50 | 1.00 | 0.00 | 0.50 | 1.00 | 0.00 | 0.50 | 1.00 |
| R18 | 0.33 | 0.67 | 1.00 | 0.33 | 0.67 | 1.00 | 0.33 | 0.67 | 1.00 | 0.33 | 0.67 | 1.00 | 0.33 | 0.67 | 1.00 | 0.33 | 0.67 | 1.00 |
| R19 | 0.33 | 0.67 | 1.00 | 0.00 | 0.33 | 0.67 | 0.00 | 0.33 | 0.67 | 0.00 | 0.33 | 0.67 | 0.00 | 0.33 | 0.67 | 0.00 | 0.00 | 0.33 |
| R20 | 0.25 | 0.50 | 0.75 | 0.00 | 0.25 | 0.50 | 0.00 | 0.25 | 0.50 | 0.00 | 0.00 | 0.25 | 0.00 | 0.00 | 0.25 | 0.00 | 0.25 | 0.50 |
| R21 | 0.00 | 0.33 | 0.67 | 0.33 | 0.67 | 1.00 | 0.33 | 0.67 | 1.00 | 0.33 | 0.67 | 1.00 | 0.33 | 0.67 | 1.00 | 0.00 | 0.33 | 0.67 |
| R22 | 0.00 | 0.25 | 0.50 | 0.00 | 0.25 | 0.50 | 0.00 | 0.00 | 0.25 | 0.00 | 0.00 | 0.25 | 0.00 | 0.25 | 0.50 | 0.00 | 0.00 | 0.25 |

**Table S11.** Matrix U resulted from matrix  $\mathcal{R}$  weighted by the vector  $\tilde{E}$  for SMIs.

| #   | P1   |      |      | P2   |      |      | P3   |      |      | P4   |      |      | P5   |      |      | P6   |      |      | P7   |      |      | P8   |      |      | P9   |      |      | P10  |      |      |
|-----|------|------|------|------|------|------|------|------|------|------|------|------|------|------|------|------|------|------|------|------|------|------|------|------|------|------|------|------|------|------|
| R1  | 0.00 | 0.17 | 0.67 | 0.00 | 0.17 | 0.67 | 0.00 | 0.17 | 0.67 | 0.00 | 0.17 | 0.67 | 0.00 | 0.17 | 0.67 | 0.00 | 0.17 | 0.67 | 0.00 | 0.17 | 0.67 | 0.00 | 0.00 | 0.33 | 0.00 | 0.00 | 0.33 | 0.00 | 0.00 | 0.33 |
| R2  | 0.00 | 0.33 | 0.67 | 0.00 | 0.33 | 0.67 | 0.17 | 0.67 | 1.00 | 0.00 | 0.33 | 0.67 | 0.00 | 0.33 | 0.67 | 0.00 | 0.33 | 0.67 | 0.00 | 0.33 | 0.67 | 0.00 | 0.33 | 0.67 | 0.00 | 0.33 | 0.67 | 0.00 | 0.33 | 0.67 |
| R3  | 0.00 | 0.13 | 0.50 | 0.00 | 0.38 | 1.00 | 0.00 | 0.38 | 1.00 | 0.00 | 0.38 | 1.00 | 0.00 | 0.38 | 1.00 | 0.00 | 0.25 | 0.75 | 0.00 | 0.13 | 0.50 | 0.00 | 0.13 | 0.50 | 0.00 | 0.25 | 0.75 | 0.00 | 0.13 | 0.50 |
| R4  | 0.00 | 0.25 | 0.75 | 0.00 | 0.25 | 0.75 | 0.00 | 0.38 | 1.00 | 0.00 | 0.25 | 0.75 | 0.00 | 0.13 | 0.50 | 0.00 | 0.25 | 0.75 | 0.00 | 0.13 | 0.50 | 0.00 | 0.13 | 0.50 | 0.00 | 0.13 | 0.50 | 0.00 | 0.13 | 0.50 |
| R5  | 0.00 | 0.00 | 0.33 | 0.00 | 0.00 | 0.50 | 0.00 | 0.00 | 0.50 | 0.00 | 0.00 | 0.50 | 0.00 | 0.00 | 0.33 | 0.00 | 0.00 | 0.33 | 0.00 | 0.00 | 0.50 | 0.00 | 0.00 | 0.50 | 0.00 | 0.00 | 0.33 | 0.00 | 0.00 | 0.33 |
| R6  | 0.00 | 0.33 | 1.00 | 0.00 | 0.17 | 0.67 | 0.00 | 0.33 | 1.00 | 0.00 | 0.00 | 0.33 | 0.00 | 0.17 | 0.67 | 0.00 | 0.00 | 0.33 | 0.00 | 0.17 | 0.67 | 0.00 | 0.00 | 0.33 | 0.00 | 0.00 | 0.33 | 0.00 | 0.00 | 0.33 |
| R7  | 0.00 | 0.00 | 1.00 | 0.00 | 0.00 | 1.00 | 0.00 | 0.00 | 1.00 | 0.00 | 0.00 | 1.00 | 0.00 | 0.00 | 1.00 | 0.00 | 0.00 | 1.00 | 0.00 | 0.00 | 1.00 | 0.00 | 0.00 | 1.00 | 0.00 | 0.00 | 1.00 | 0.00 | 0.00 | 1.00 |
| R8  | 0.00 | 0.33 | 1.00 | 0.00 | 0.17 | 0.67 | 0.00 | 0.33 | 1.00 | 0.00 | 0.33 | 1.00 | 0.00 | 0.33 | 1.00 | 0.00 | 0.33 | 1.00 | 0.00 | 0.33 | 1.00 | 0.00 | 0.17 | 0.67 | 0.00 | 0.33 | 1.00 | 0.00 | 0.33 | 1.00 |
| R9  | 0.00 | 0.25 | 1.00 | 0.00 | 0.25 | 1.00 | 0.00 | 0.25 | 1.00 | 0.00 | 0.25 | 1.00 | 0.00 | 0.25 | 1.00 | 0.00 | 0.00 | 0.50 | 0.00 | 0.25 | 1.00 | 0.00 | 0.25 | 1.00 | 0.00 | 0.00 | 0.50 | 0.00 | 0.25 | 1.00 |
| R10 | 0.00 | 0.00 | 0.50 | 0.00 | 0.00 | 0.50 | 0.00 | 0.00 | 0.50 | 0.00 | 0.00 | 0.50 | 0.00 | 0.00 | 0.50 | 0.00 | 0.00 | 0.50 | 0.00 | 0.00 | 0.50 | 0.00 | 0.00 | 0.50 | 0.00 | 0.00 | 0.50 | 0.00 | 0.00 | 0.50 |
| R11 | 0.00 | 0.00 | 0.38 | 0.00 | 0.00 | 0.38 | 0.00 | 0.00 | 0.38 | 0.00 | 0.00 | 0.38 | 0.00 | 0.00 | 0.38 | 0.00 | 0.00 | 0.50 | 0.00 | 0.00 | 0.25 | 0.00 | 0.00 | 0.25 | 0.00 | 0.00 | 0.38 | 0.00 | 0.00 | 0.38 |
| R12 | 0.17 | 0.67 | 1.00 | 0.17 | 0.67 | 1.00 | 0.00 | 0.33 | 0.67 | 0.00 | 0.33 | 0.67 | 0.00 | 0.33 | 0.67 | 0.17 | 0.67 | 1.00 | 0.00 | 0.33 | 0.67 | 0.00 | 0.00 | 0.33 | 0.00 | 0.00 | 0.33 | 0.00 | 0.00 | 0.33 |
| R13 | 0.00 | 0.50 | 1.00 | 0.00 | 0.50 | 1.00 | 0.00 | 0.00 | 0.50 | 0.00 | 0.50 | 1.00 | 0.00 | 0.00 | 0.50 | 0.00 | 0.00 | 0.50 | 0.00 | 0.50 | 1.00 | 0.00 | 0.00 | 0.50 | 0.00 | 0.00 | 0.50 | 0.00 | 0.00 | 0.50 |
| R14 | 0.00 | 0.17 | 0.67 | 0.00 | 0.17 | 0.67 | 0.00 | 0.17 | 0.67 | 0.00 | 0.00 | 0.33 | 0.00 | 0.00 | 0.33 | 0.00 | 0.33 | 1.00 | 0.00 | 0.17 | 0.67 | 0.00 | 0.00 | 0.33 | 0.00 | 0.00 | 0.33 | 0.00 | 0.00 | 0.33 |
| R15 | 0.00 | 0.25 | 1.00 | 0.00 | 0.25 | 1.00 | 0.00 | 0.25 | 1.00 | 0.00 | 0.00 | 0.50 | 0.00 | 0.25 | 1.00 | 0.00 | 0.00 | 0.50 | 0.00 | 0.00 | 0.50 | 0.00 | 0.25 | 1.00 | 0.00 | 0.00 | 0.50 | 0.00 | 0.00 | 0.50 |
| R16 | 0.00 | 0.00 | 0.50 | 0.00 | 0.00 | 0.33 | 0.00 | 0.00 | 0.50 | 0.00 | 0.00 | 0.33 | 0.00 | 0.00 | 0.33 | 0.00 | 0.00 | 0.33 | 0.00 | 0.00 | 0.33 | 0.00 | 0.00 | 0.17 | 0.00 | 0.00 | 0.17 | 0.00 | 0.00 | 0.17 |
| R17 | 0.00 | 0.50 | 1.00 | 0.00 | 0.50 | 1.00 | 0.00 | 0.50 | 1.00 | 0.00 | 0.50 | 1.00 | 0.00 | 0.50 | 1.00 | 0.00 | 0.50 | 1.00 | 0.00 | 0.50 | 1.00 | 0.00 | 0.50 | 1.00 | 0.00 | 0.50 | 1.00 | 0.00 | 0.50 | 1.00 |
| R18 | 0.00 | 0.17 | 0.67 | 0.00 | 0.17 | 0.67 | 0.00 | 0.17 | 0.67 | 0.00 | 0.17 | 0.67 | 0.00 | 0.17 | 0.67 | 0.00 | 0.17 | 0.67 | 0.00 | 0.17 | 0.67 | 0.00 | 0.17 | 0.67 | 0.00 | 0.17 | 0.67 | 0.00 | 0.33 | 1.00 |
| R19 | 0.00 | 0.00 | 0.33 | 0.00 | 0.00 | 0.33 | 0.00 | 0.00 | 0.33 | 0.00 | 0.00 | 0.33 | 0.00 | 0.00 | 0.17 | 0.00 | 0.00 | 0.17 | 0.00 | 0.00 | 0.50 | 0.00 | 0.00 | 0.17 | 0.00 | 0.00 | 0.50 | 0.00 | 0.00 | 0.50 |
| R20 | 0.00 | 0.00 | 0.25 | 0.00 | 0.00 | 0.25 | 0.00 | 0.00 | 0.50 | 0.00 | 0.00 | 0.25 | 0.00 | 0.00 | 0.25 | 0.00 | 0.00 | 0.25 | 0.00 | 0.00 | 0.25 | 0.00 | 0.00 | 0.25 | 0.00 | 0.00 | 0.25 | 0.00 | 0.00 | 0.25 |
| R21 | 0.17 | 0.67 | 1.00 | 0.17 | 0.67 | 1.00 | 0.17 | 0.67 | 1.00 | 0.17 | 0.67 | 1.00 | 0.17 | 0.67 | 1.00 | 0.17 | 0.67 | 1.00 | 0.17 | 0.67 | 1.00 | 0.00 | 0.33 | 0.67 | 0.00 | 0.33 | 0.67 | 0.17 | 0.67 | 1.00 |
| R22 | 0.00 | 0.13 | 0.50 | 0.00 | 0.13 | 0.50 | 0.00 | 0.13 | 0.50 | 0.00 | 0.13 | 0.50 | 0.00 | 0.38 | 1.00 | 0.00 | 0.13 | 0.50 | 0.00 | 0.13 | 0.50 | 0.00 | 0.25 | 0.75 | 0.00 | 0.13 | 0.50 | 0.00 | 0.00 | 0.25 |

(Table S11 - Continues)



(Table S11 - Ends)

| #   | P11  |      |      | P12  |      |      | P13  |      |      | P14  |      |      | P15  |      |      | P16  |      |      |
|-----|------|------|------|------|------|------|------|------|------|------|------|------|------|------|------|------|------|------|
| R1  | 0.00 | 0.00 | 0.33 | 0.00 | 0.17 | 0.67 | 0.00 | 0.17 | 0.67 | 0.00 | 0.33 | 1.00 | 0.00 | 0.17 | 0.67 | 0.00 | 0.00 | 0.33 |
| R2  | 0.00 | 0.33 | 0.67 | 0.00 | 0.33 | 0.67 | 0.00 | 0.33 | 0.67 | 0.00 | 0.33 | 0.67 | 0.00 | 0.33 | 0.67 | 0.00 | 0.00 | 0.33 |
| R3  | 0.00 | 0.38 | 1.00 | 0.00 | 0.38 | 1.00 | 0.00 | 0.25 | 0.75 | 0.00 | 0.00 | 0.25 | 0.00 | 0.13 | 0.50 | 0.00 | 0.13 | 0.50 |
| R4  | 0.00 | 0.25 | 0.75 | 0.00 | 0.25 | 0.75 | 0.00 | 0.25 | 0.75 | 0.00 | 0.13 | 0.50 | 0.00 | 0.13 | 0.50 | 0.00 | 0.13 | 0.50 |
| R5  | 0.00 | 0.00 | 0.50 | 0.00 | 0.00 | 0.33 | 0.00 | 0.00 | 0.33 | 0.00 | 0.00 | 0.33 | 0.00 | 0.00 | 0.50 | 0.00 | 0.00 | 0.50 |
| R6  | 0.00 | 0.00 | 0.33 | 0.00 | 0.17 | 0.67 | 0.00 | 0.00 | 0.33 | 0.00 | 0.00 | 0.33 | 0.00 | 0.00 | 0.33 | 0.00 | 0.00 | 0.33 |
| R7  | 0.00 | 0.00 | 1.00 | 0.00 | 0.00 | 1.00 | 0.00 | 0.00 | 1.00 | 0.00 | 0.00 | 1.00 | 0.00 | 0.00 | 1.00 | 0.00 | 0.00 | 1.00 |
| R8  | 0.00 | 0.33 | 1.00 | 0.00 | 0.33 | 1.00 | 0.00 | 0.33 | 1.00 | 0.00 | 0.17 | 0.67 | 0.00 | 0.17 | 0.67 | 0.00 | 0.17 | 0.67 |
| R9  | 0.00 | 0.25 | 1.00 | 0.00 | 0.25 | 1.00 | 0.00 | 0.25 | 1.00 | 0.00 | 0.00 | 0.50 | 0.00 | 0.00 | 0.50 | 0.00 | 0.00 | 0.50 |
| R10 | 0.00 | 0.00 | 0.50 | 0.00 | 0.00 | 0.50 | 0.00 | 0.00 | 0.50 | 0.00 | 0.00 | 0.50 | 0.00 | 0.00 | 0.50 | 0.00 | 0.00 | 0.25 |
| R11 | 0.00 | 0.00 | 0.38 | 0.00 | 0.00 | 0.38 | 0.00 | 0.00 | 0.38 | 0.00 | 0.00 | 0.25 | 0.00 | 0.00 | 0.38 | 0.00 | 0.00 | 0.38 |
| R12 | 0.00 | 0.33 | 0.67 | 0.00 | 0.33 | 0.67 | 0.00 | 0.33 | 0.67 | 0.00 | 0.33 | 0.67 | 0.00 | 0.33 | 0.67 | 0.00 | 0.00 | 0.33 |
| R13 | 0.00 | 0.50 | 1.00 | 0.00 | 0.00 | 0.50 | 0.00 | 0.00 | 0.50 | 0.00 | 0.00 | 0.50 | 0.00 | 0.00 | 0.50 | 0.00 | 0.00 | 0.50 |
| R14 | 0.00 | 0.00 | 0.33 | 0.00 | 0.17 | 0.67 | 0.00 | 0.17 | 0.67 | 0.00 | 0.00 | 0.33 | 0.00 | 0.00 | 0.33 | 0.00 | 0.00 | 0.33 |
| R15 | 0.00 | 0.00 | 0.50 | 0.00 | 0.00 | 0.50 | 0.00 | 0.00 | 0.50 | 0.00 | 0.00 | 0.50 | 0.00 | 0.25 | 1.00 | 0.00 | 0.00 | 0.50 |
| R16 | 0.00 | 0.00 | 0.33 | 0.00 | 0.00 | 0.17 | 0.00 | 0.00 | 0.17 | 0.00 | 0.00 | 0.17 | 0.00 | 0.00 | 0.17 | 0.00 | 0.00 | 0.17 |
| R17 | 0.00 | 0.50 | 1.00 | 0.00 | 0.50 | 1.00 | 0.00 | 0.50 | 1.00 | 0.00 | 0.50 | 1.00 | 0.00 | 0.50 | 1.00 | 0.00 | 0.50 | 1.00 |
| R18 | 0.00 | 0.33 | 1.00 | 0.00 | 0.33 | 1.00 | 0.00 | 0.33 | 1.00 | 0.00 | 0.33 | 1.00 | 0.00 | 0.33 | 1.00 | 0.00 | 0.33 | 1.00 |
| R19 | 0.00 | 0.00 | 0.50 | 0.00 | 0.00 | 0.33 | 0.00 | 0.00 | 0.33 | 0.00 | 0.00 | 0.33 | 0.00 | 0.00 | 0.33 | 0.00 | 0.00 | 0.17 |
| R20 | 0.00 | 0.00 | 0.38 | 0.00 | 0.00 | 0.25 | 0.00 | 0.00 | 0.25 | 0.00 | 0.00 | 0.13 | 0.00 | 0.00 | 0.13 | 0.00 | 0.00 | 0.25 |
| R21 | 0.00 | 0.33 | 0.67 | 0.17 | 0.67 | 1.00 | 0.17 | 0.67 | 1.00 | 0.17 | 0.67 | 1.00 | 0.17 | 0.67 | 1.00 | 0.00 | 0.33 | 0.67 |
| R22 | 0.00 | 0.13 | 0.50 | 0.00 | 0.13 | 0.50 | 0.00 | 0.00 | 0.25 | 0.00 | 0.00 | 0.25 | 0.00 | 0.13 | 0.50 | 0.00 | 0.00 | 0.25 |

**Table S12.** Distance to the Positive Ideal Solution for SMIs.

| #   | P1    | P2    | P3    | P4    | P5    | P6    | P7    | P8    | P9    | P10   | P11   | P12   | P13   | P14   | P15   | P16   |
|-----|-------|-------|-------|-------|-------|-------|-------|-------|-------|-------|-------|-------|-------|-------|-------|-------|
| R1  | 0.78  | 0.78  | 0.78  | 0.78  | 0.78  | 0.78  | 0.78  | 0.90  | 0.90  | 0.90  | 0.90  | 0.78  | 0.78  | 0.69  | 0.78  | 0.90  |
| R2  | 0.72  | 0.72  | 0.52  | 0.72  | 0.72  | 0.72  | 0.72  | 0.72  | 0.72  | 0.72  | 0.72  | 0.72  | 0.72  | 0.72  | 0.72  | 0.90  |
| R3  | 0.82  | 0.68  | 0.68  | 0.68  | 0.68  | 0.74  | 0.82  | 0.82  | 0.74  | 0.82  | 0.68  | 0.68  | 0.74  | 0.92  | 0.82  | 0.82  |
| R4  | 0.74  | 0.74  | 0.68  | 0.74  | 0.82  | 0.74  | 0.82  | 0.82  | 0.82  | 0.82  | 0.74  | 0.74  | 0.74  | 0.82  | 0.82  | 0.82  |
| R5  | 0.90  | 0.87  | 0.87  | 0.87  | 0.90  | 0.90  | 0.87  | 0.87  | 0.90  | 0.90  | 0.87  | 0.90  | 0.90  | 0.90  | 0.87  | 0.87  |
| R6  | 0.69  | 0.78  | 0.69  | 0.90  | 0.78  | 0.90  | 0.78  | 0.90  | 0.90  | 0.90  | 0.90  | 0.78  | 0.90  | 0.90  | 0.90  | 0.90  |
| R7  | 0.82  | 0.82  | 0.82  | 0.82  | 0.82  | 0.82  | 0.82  | 0.82  | 0.82  | 0.82  | 0.82  | 0.82  | 0.82  | 0.82  | 0.82  | 0.82  |
| R8  | 0.69  | 0.78  | 0.69  | 0.69  | 0.69  | 0.69  | 0.69  | 0.78  | 0.69  | 0.69  | 0.69  | 0.69  | 0.69  | 0.78  | 0.78  | 0.78  |
| R9  | 0.72  | 0.72  | 0.72  | 0.72  | 0.72  | 0.87  | 0.72  | 0.72  | 0.87  | 0.72  | 0.72  | 0.72  | 0.72  | 0.87  | 0.87  | 0.87  |
| R10 | 0.87  | 0.87  | 0.87  | 0.87  | 0.87  | 0.87  | 0.87  | 0.87  | 0.87  | 0.87  | 0.87  | 0.87  | 0.87  | 0.87  | 0.87  | 0.92  |
| R11 | 0.89  | 0.89  | 0.89  | 0.89  | 0.89  | 0.87  | 0.92  | 0.92  | 0.89  | 0.89  | 0.89  | 0.89  | 0.89  | 0.92  | 0.89  | 0.89  |
| R12 | 0.52  | 0.52  | 0.72  | 0.72  | 0.72  | 0.52  | 0.72  | 0.90  | 0.90  | 0.90  | 0.72  | 0.72  | 0.72  | 0.72  | 0.72  | 0.90  |
| R13 | 0.65  | 0.65  | 0.87  | 0.65  | 0.87  | 0.87  | 0.65  | 0.87  | 0.87  | 0.87  | 0.65  | 0.87  | 0.87  | 0.87  | 0.87  | 0.87  |
| R14 | 0.78  | 0.78  | 0.78  | 0.90  | 0.90  | 0.69  | 0.78  | 0.90  | 0.90  | 0.90  | 0.90  | 0.78  | 0.78  | 0.90  | 0.90  | 0.90  |
| R15 | 0.72  | 0.72  | 0.72  | 0.87  | 0.72  | 0.87  | 0.87  | 0.72  | 0.87  | 0.87  | 0.87  | 0.87  | 0.87  | 0.87  | 0.72  | 0.87  |
| R16 | 0.87  | 0.90  | 0.87  | 0.90  | 0.90  | 0.90  | 0.90  | 0.95  | 0.95  | 0.95  | 0.90  | 0.95  | 0.95  | 0.95  | 0.95  | 0.95  |
| R17 | 0.65  | 0.65  | 0.65  | 0.65  | 0.65  | 0.65  | 0.65  | 0.65  | 0.65  | 0.65  | 0.65  | 0.65  | 0.65  | 0.65  | 0.65  | 0.65  |
| R18 | 0.78  | 0.78  | 0.78  | 0.78  | 0.78  | 0.78  | 0.78  | 0.78  | 0.78  | 0.69  | 0.69  | 0.69  | 0.69  | 0.69  | 0.69  | 0.69  |
| R19 | 0.90  | 0.90  | 0.90  | 0.90  | 0.95  | 0.95  | 0.87  | 0.95  | 0.87  | 0.87  | 0.87  | 0.90  | 0.90  | 0.90  | 0.90  | 0.95  |
| R20 | 0.92  | 0.92  | 0.87  | 0.92  | 0.92  | 0.92  | 0.92  | 0.92  | 0.92  | 0.92  | 0.89  | 0.92  | 0.92  | 0.96  | 0.96  | 0.92  |
| R21 | 0.52  | 0.52  | 0.52  | 0.52  | 0.52  | 0.52  | 0.52  | 0.72  | 0.72  | 0.52  | 0.72  | 0.52  | 0.52  | 0.52  | 0.52  | 0.72  |
| R22 | 0.82  | 0.82  | 0.82  | 0.82  | 0.68  | 0.82  | 0.82  | 0.74  | 0.82  | 0.92  | 0.82  | 0.82  | 0.92  | 0.92  | 0.82  | 0.92  |
| Sum | 16.75 | 16.78 | 16.68 | 17.30 | 17.27 | 17.36 | 17.26 | 18.23 | 18.36 | 18.12 | 17.47 | 17.26 | 17.55 | 18.16 | 17.82 | 18.83 |

**Table S13.** Distance to the Negative Ideal Solution for SMIs.

| #   | P1   | P2   | P3    | P4   | P5   | P6   | P7   | P8   | P9   | P10  | P11  | P12  | P13  | P14  | P15  | P16  |
|-----|------|------|-------|------|------|------|------|------|------|------|------|------|------|------|------|------|
| R1  | 0.40 | 0.40 | 0.40  | 0.40 | 0.40 | 0.40 | 0.40 | 0.19 | 0.19 | 0.19 | 0.19 | 0.40 | 0.40 | 0.61 | 0.40 | 0.19 |
| R2  | 0.43 | 0.43 | 0.70  | 0.43 | 0.43 | 0.43 | 0.43 | 0.43 | 0.43 | 0.43 | 0.43 | 0.43 | 0.43 | 0.43 | 0.43 | 0.19 |
| R3  | 0.30 | 0.62 | 0.62  | 0.62 | 0.62 | 0.46 | 0.30 | 0.30 | 0.46 | 0.30 | 0.62 | 0.62 | 0.46 | 0.14 | 0.30 | 0.30 |
| R4  | 0.46 | 0.46 | 0.62  | 0.46 | 0.30 | 0.46 | 0.30 | 0.30 | 0.30 | 0.30 | 0.46 | 0.46 | 0.46 | 0.30 | 0.30 | 0.30 |
| R5  | 0.19 | 0.29 | 0.29  | 0.29 | 0.19 | 0.19 | 0.29 | 0.29 | 0.19 | 0.19 | 0.29 | 0.19 | 0.19 | 0.19 | 0.29 | 0.29 |
| R6  | 0.61 | 0.40 | 0.61  | 0.19 | 0.40 | 0.19 | 0.40 | 0.19 | 0.19 | 0.19 | 0.19 | 0.40 | 0.19 | 0.19 | 0.19 | 0.19 |
| R7  | 0.58 | 0.58 | 0.58  | 0.58 | 0.58 | 0.58 | 0.58 | 0.58 | 0.58 | 0.58 | 0.58 | 0.58 | 0.58 | 0.58 | 0.58 | 0.58 |
| R8  | 0.61 | 0.40 | 0.61  | 0.61 | 0.61 | 0.61 | 0.61 | 0.40 | 0.61 | 0.61 | 0.61 | 0.61 | 0.61 | 0.40 | 0.40 | 0.40 |
| R9  | 0.60 | 0.60 | 0.60  | 0.60 | 0.60 | 0.29 | 0.60 | 0.60 | 0.29 | 0.60 | 0.60 | 0.60 | 0.60 | 0.29 | 0.29 | 0.29 |
| R10 | 0.29 | 0.29 | 0.29  | 0.29 | 0.29 | 0.29 | 0.29 | 0.29 | 0.29 | 0.29 | 0.29 | 0.29 | 0.29 | 0.29 | 0.29 | 0.14 |
| R11 | 0.22 | 0.22 | 0.22  | 0.22 | 0.22 | 0.29 | 0.14 | 0.14 | 0.22 | 0.22 | 0.22 | 0.22 | 0.22 | 0.14 | 0.22 | 0.22 |
| R12 | 0.70 | 0.70 | 0.43  | 0.43 | 0.43 | 0.70 | 0.43 | 0.19 | 0.19 | 0.19 | 0.43 | 0.43 | 0.43 | 0.43 | 0.43 | 0.19 |
| R13 | 0.65 | 0.65 | 0.29  | 0.65 | 0.29 | 0.29 | 0.65 | 0.29 | 0.29 | 0.29 | 0.65 | 0.29 | 0.29 | 0.29 | 0.29 | 0.29 |
| R14 | 0.40 | 0.40 | 0.40  | 0.19 | 0.19 | 0.61 | 0.40 | 0.19 | 0.19 | 0.19 | 0.19 | 0.40 | 0.40 | 0.19 | 0.19 | 0.19 |
| R15 | 0.60 | 0.60 | 0.60  | 0.29 | 0.60 | 0.29 | 0.29 | 0.60 | 0.29 | 0.29 | 0.29 | 0.29 | 0.29 | 0.29 | 0.60 | 0.29 |
| R16 | 0.29 | 0.19 | 0.29  | 0.19 | 0.19 | 0.19 | 0.19 | 0.10 | 0.10 | 0.10 | 0.19 | 0.10 | 0.10 | 0.10 | 0.10 | 0.10 |
| R17 | 0.65 | 0.65 | 0.65  | 0.65 | 0.65 | 0.65 | 0.65 | 0.65 | 0.65 | 0.65 | 0.65 | 0.65 | 0.65 | 0.65 | 0.65 | 0.65 |
| R18 | 0.40 | 0.40 | 0.40  | 0.40 | 0.40 | 0.40 | 0.40 | 0.40 | 0.40 | 0.61 | 0.61 | 0.61 | 0.61 | 0.61 | 0.61 | 0.61 |
| R19 | 0.19 | 0.19 | 0.19  | 0.19 | 0.10 | 0.10 | 0.29 | 0.10 | 0.29 | 0.29 | 0.29 | 0.19 | 0.19 | 0.19 | 0.19 | 0.10 |
| R20 | 0.14 | 0.14 | 0.29  | 0.14 | 0.14 | 0.14 | 0.14 | 0.14 | 0.14 | 0.14 | 0.22 | 0.14 | 0.14 | 0.07 | 0.07 | 0.14 |
| R21 | 0.70 | 0.70 | 0.70  | 0.70 | 0.70 | 0.70 | 0.70 | 0.43 | 0.43 | 0.70 | 0.43 | 0.70 | 0.70 | 0.70 | 0.70 | 0.43 |
| R22 | 0.30 | 0.30 | 0.30  | 0.30 | 0.62 | 0.30 | 0.30 | 0.46 | 0.30 | 0.14 | 0.30 | 0.30 | 0.14 | 0.14 | 0.30 | 0.14 |
| Sum | 9.67 | 9.57 | 10.03 | 8.79 | 8.92 | 8.54 | 8.75 | 7.24 | 7.00 | 7.48 | 8.70 | 8.87 | 8.35 | 7.22 | 7.79 | 6.21 |

**Table S14.** Total positive and negative distances and  $CC_i$  for SMIs.

| <b>v</b>   | <b>d+</b> | <b>d-</b> | <b>CCi</b> |
|------------|-----------|-----------|------------|
| <b>P1</b>  | 16.75     | 9.672     | 0.366      |
| <b>P2</b>  | 16.78     | 9.567     | 0.363      |
| <b>P3</b>  | 16.68     | 10.03     | 0.376      |
| <b>P4</b>  | 17.3      | 8.794     | 0.337      |
| <b>P5</b>  | 17.27     | 8.916     | 0.34       |
| <b>P6</b>  | 17.36     | 8.537     | 0.33       |
| <b>P7</b>  | 17.26     | 8.749     | 0.336      |
| <b>P8</b>  | 18.23     | 7.236     | 0.284      |
| <b>P9</b>  | 18.36     | 7.003     | 0.276      |
| <b>P10</b> | 18.12     | 7.479     | 0.292      |
| <b>P11</b> | 17.47     | 8.7       | 0.332      |
| <b>P12</b> | 17.26     | 8.865     | 0.339      |
| <b>P13</b> | 17.55     | 8.347     | 0.322      |
| <b>P14</b> | 18.16     | 7.221     | 0.285      |
| <b>P15</b> | 17.82     | 7.791     | 0.304      |
| <b>P16</b> | 18.83     | 6.213     | 0.248      |
